# Supplementary material for: Low-level nutrient enrichment during thermal stress delays bleaching and ameliorates calcification in three Hawaiian reef coral species
Source: PeerJ. 2022 Jul 14;10:e13707. doi: 10.7717/peerj.13707 (PMC9288827; doi:10.7717/peerj.13707)
Supplement: Supplemental Information 2 [file peerj-10-13707-s002.xlsx]

## Sheet: Metadata
Variable Name	Variable Type	Unit	Notes
Flow Rate	Abiotic	sec/10L	Flow rate of water through mesocosm tanks
Peristatic Pump Rate	Abiotic	mL/min	Pump rate of nutrients into mesocosm tanks
Nutrient Concentration	Abiotic	μM	Nutrient concentration measured in mesocosm tanks or at field stations
Temperature	Abiotic	°C	Temperature of water measured in mesocosm tanks
Calcification Rate	Biotic	mm/day	Calcification rate as measured by buoyant weight at the end of a given phase
Partial Bleaching	Biotic	%	Percentage of colony that is bleached
Days to Bleaching (DTB)	Biotic	days	Amount of days from the beginning of the heating period to >95% partial bleaching of a colony
Partial Mortality	Biotic	%	Percentage of colony that is dead
Days to Mortality (DTM)	Biotic	days	Amount of days from the beginning of the heating period to >95% partial mortality of a colony
Total Mortality	Biotic	NA	If partial mortality >95%, assigned as "dead" (1). If partial morality <95%, assigned as "living" (0).
Visual Assessment Conditions	Biotic	NA	Predominant visual condition of colony: normal, pale, bleached, or dead
Tank	Organizational	NA	Mesocom tank number (1-12)
Row	Organizational	NA	Row location of colony in mesocosm (1-5)
Column	Organizational	NA	Column location of colony in mesocosm (1-6)
Phase	Begin Date	End Date
Acclimation	June 21st, 2019	July 12th, 2019
Heating (Experimental Period)	July 13th, 2019	August 12th, 2019
Treatment	Abbreviation
Ambient Temperature and Ambient Nutrients	A
Ambient Temperature and Enriched Nutrients	N
Elevated Temperature and Enriched Nutrients	NH
Elevated Temperature and Ambient Nutrients	H
Species	Abbrevation
Lobactis scutaria	Ls
Montipora capitata	Mc
Pocillopora acuta	Pa

## Sheet: Flow Rate
Mesocosm	Treatment	Flow_Rate
Tank1	A	48
Tank1	A	52.9
Tank1	A	60.5
Tank1	A	55.3
Tank1	A	52.9
Tank1	A	55.3
Tank1	A	60.8
Tank1	A	34.1
Tank1	A	33.2
Tank1	A	34.3
Tank1	A	34.2
Tank1	A	35.8
Tank1	A	37.6
Tank1	A	36.9
Tank1	A	37.2
Tank1	A	36.4
Tank1	A	36.9
Tank1	A	43.7
Tank1	A	39.4
Tank1	A	40.6
Tank1	A	40.6
Tank1	A	40.4
Tank1	A	43.3
Tank1	A	44.5
Tank1	A	43.7
Tank1	A	48.1
Tank1	A	53.5
Tank2	H	52
Tank2	H	45.6
Tank2	H	54.5
Tank2	H	58.7
Tank2	H	45.6
Tank2	H	58.7
Tank2	H	59.2
Tank2	H	30.6
Tank2	H	29.2
Tank2	H	34.3
Tank2	H	30.2
Tank2	H	30
Tank2	H	47.3
Tank2	H	45.7
Tank2	H	44.7
Tank2	H	42.8
Tank2	H	30.3
Tank2	H	30.3
Tank2	H	35.8
Tank2	H	38.3
Tank2	H	38.3
Tank2	H	37.8
Tank2	H	41.6
Tank2	H	41
Tank2	H	44.5
Tank2	H	47.1
Tank2	H	46.9
Tank3	NH	56
Tank3	NH	56
Tank3	NH	60.5
Tank3	NH	66.2
Tank3	NH	56
Tank3	NH	66.2
Tank3	NH	55.3
Tank3	NH	31.3
Tank3	NH	37.5
Tank3	NH	29.9
Tank3	NH	30.2
Tank3	NH	30.9
Tank3	NH	32.9
Tank3	NH	32.1
Tank3	NH	32.9
Tank3	NH	33.6
Tank3	NH	32
Tank3	NH	39
Tank3	NH	38.2
Tank3	NH	40.9
Tank3	NH	40.9
Tank3	NH	43.3
Tank3	NH	45.1
Tank3	NH	45.1
Tank3	NH	47.2
Tank3	NH	50.4
Tank3	NH	52.2
Tank4	A	42
Tank4	A	50.5
Tank4	A	67
Tank4	A	54
Tank4	A	50.5
Tank4	A	55
Tank4	A	58.3
Tank4	A	32.3
Tank4	A	34.3
Tank4	A	35.4
Tank4	A	35.9
Tank4	A	37
Tank4	A	36.7
Tank4	A	40.1
Tank4	A	38.4
Tank4	A	40.7
Tank4	A	37.5
Tank4	A	47.4
Tank4	A	46.9
Tank4	A	47.6
Tank4	A	47.6
Tank4	A	48.5
Tank4	A	49
Tank4	A	49.4
Tank4	A	54.1
Tank4	A	60.9
Tank4	A	58.4
Tank5	N	44
Tank5	N	55
Tank5	N	56.2
Tank5	N	65
Tank5	N	55
Tank5	N	65
Tank5	N	68.5
Tank5	N	34.3
Tank5	N	34.3
Tank5	N	35.4
Tank5	N	35.3
Tank5	N	37.6
Tank5	N	38.2
Tank5	N	38.3
Tank5	N	39.1
Tank5	N	39.9
Tank5	N	37.1
Tank5	N	37.1
Tank5	N	43.1
Tank5	N	45.6
Tank5	N	45.6
Tank5	N	46.7
Tank5	N	48.2
Tank5	N	48.2
Tank5	N	57.4
Tank5	N	62.9
Tank5	N	68.1
Tank6	H	55
Tank6	H	55.8
Tank6	H	59.5
Tank6	H	67
Tank6	H	55.8
Tank6	H	67
Tank6	H	62.8
Tank6	H	27.1
Tank6	H	28.3
Tank6	H	32.5
Tank6	H	30.9
Tank6	H	31.6
Tank6	H	33
Tank6	H	33.1
Tank6	H	31.8
Tank6	H	32.4
Tank6	H	40.7
Tank6	H	40.7
Tank6	H	43.8
Tank6	H	44
Tank6	H	44
Tank6	H	45.5
Tank6	H	46.5
Tank6	H	47.6
Tank6	H	52.5
Tank6	H	59.1
Tank6	H	59.4
Tank7	H	49
Tank7	H	52.5
Tank7	H	48.9
Tank7	H	58.8
Tank7	H	52.5
Tank7	H	58.8
Tank7	H	66.4
Tank7	H	40.7
Tank7	H	42.9
Tank7	H	42.4
Tank7	H	42
Tank7	H	43.8
Tank7	H	43.2
Tank7	H	45.6
Tank7	H	46.7
Tank7	H	45.5
Tank7	H	45.8
Tank7	H	55.1
Tank7	H	55.4
Tank7	H	59.1
Tank7	H	59.1
Tank7	H	58.6
Tank7	H	59.4
Tank7	H	60.9
Tank7	H	63.5
Tank7	H	52.9
Tank7	H	58.1
Tank9	N	48
Tank9	N	50.4
Tank9	N	54
Tank9	N	54
Tank9	N	50.4
Tank9	N	55
Tank9	N	60.7
Tank9	N	35.6
Tank9	N	39.1
Tank9	N	41.7
Tank9	N	42.6
Tank9	N	42.3
Tank9	N	45.4
Tank9	N	44.1
Tank9	N	45.6
Tank9	N	45.5
Tank9	N	44
Tank9	N	44
Tank9	N	51.9
Tank9	N	53
Tank9	N	53
Tank9	N	53.1
Tank9	N	54.4
Tank9	N	55.3
Tank9	N	65.8
Tank9	N	53.4
Tank9	N	62.8
Tank10	N	52
Tank10	N	51.3
Tank10	N	54
Tank10	N	55.5
Tank10	N	51.3
Tank10	N	55.5
Tank10	N	63.8
Tank10	N	37.5
Tank10	N	38.6
Tank10	N	38.1
Tank10	N	38.5
Tank10	N	38.6
Tank10	N	38.7
Tank10	N	39.9
Tank10	N	40.4
Tank10	N	40.3
Tank10	N	40
Tank10	N	40
Tank10	N	51.9
Tank10	N	51.6
Tank10	N	51.6
Tank10	N	51.4
Tank10	N	53.6
Tank10	N	53.7
Tank10	N	59.5
Tank10	N	64.2
Tank10	N	51
Tank11	A	37
Tank11	A	61.1
Tank11	A	62.7
Tank11	A	75.4
Tank11	A	61.1
Tank11	A	75.4
Tank11	A	82.8
Tank11	A	36.5
Tank11	A	36.6
Tank11	A	38
Tank11	A	38.2
Tank11	A	37.8
Tank11	A	38.9
Tank11	A	39.4
Tank11	A	41.4
Tank11	A	42.3
Tank11	A	40.2
Tank11	A	40.2
Tank11	A	49.8
Tank11	A	48.7
Tank11	A	48.7
Tank11	A	48.7
Tank11	A	49.1
Tank11	A	48.3
Tank11	A	59.1
Tank11	A	58.4
Tank11	A	61.4
Tank12	NH	44
Tank12	NH	43.5
Tank12	NH	51
Tank12	NH	49.5
Tank12	NH	43.5
Tank12	NH	49.5
Tank12	NH	57.9
Tank12	NH	32.2
Tank12	NH	32.5
Tank12	NH	33
Tank12	NH	33.3
Tank12	NH	36.4
Tank12	NH	36.8
Tank12	NH	36.3
Tank12	NH	38.2
Tank12	NH	38.8
Tank12	NH	37.8
Tank12	NH	37.8
Tank12	NH	44.7
Tank12	NH	48.1
Tank12	NH	48.1
Tank12	NH	46.4
Tank12	NH	47.3
Tank12	NH	47.1
Tank12	NH	45.6
Tank12	NH	54
Tank12	NH	44.9

## Sheet: Peristatic Rate
Mesocosm	Peristatic_Rate
NH - 3	3.3
NH - 3	3.2
NH - 3	3.2
NH - 3	2.8
NH - 3	3.1
NH - 3	3.2
NH - 3	3.1
NH - 3	3.1
NH - 3	3.2
NH - 3	3.2
NH - 3	3.2
NH - 3	3.2
NH - 3	3.2
NH - 3	3.2
NH - 3	3.2
NH - 3	3.3
NH - 3	3.2
NH - 3	3.2
NH - 3	3.2
NH - 3	3.1
NH - 3	3.1
NH - 3	3.2
NH - 3	3.2
NH - 3	3.2
N - 5	3
N - 5	3.4
N - 5	3.2
N - 5	3.2
N - 5	3.2
N - 5	3.2
N - 5	3.2
N - 5	3.2
N - 5	3.2
N - 5	3.2
N - 5	3.2
N - 5	3.2
N - 5	3.2
N - 5	3.2
N - 5	3.2
N - 5	3.2
N - 5	3.2
N - 5	3.2
N - 5	3.2
N - 5	3.2
N - 5	3.2
N - 5	3.2
N - 5	3.2
N - 5	3.2
N - 9	3
N - 9	3.3
N - 9	3.8
N - 9	3.1
N - 9	3.2
N - 9	3.2
N - 9	3.2
N - 9	3.2
N - 9	3.1
N - 9	3.1
N - 9	3.1
N - 9	3
N - 9	3.2
N - 9	3.2
N - 9	3.2
N - 9	3.2
N - 9	3.2
N - 9	3.2
N - 9	3.2
N - 9	3.2
N - 9	3.2
N - 9	3.1
N - 9	3.1
N - 9	3
N - 10	3.3
N - 10	3.3
N - 10	3.8
N - 10	3.2
N - 10	3.2
N - 10	3.2
N - 10	3.2
N - 10	3.2
N - 10	3.2
N - 10	3.2
N - 10	3.2
N - 10	3.1
N - 10	3.2
N - 10	3.2
N - 10	3.1
N - 10	3.1
N - 10	3.1
N - 10	3.2
N - 10	3.2
N - 10	3.2
N - 10	3.2
N - 10	3.2
N - 10	3.2
N - 10	3.1
NH - 12	3.5
NH - 12	3.5
NH - 12	3.8
NH - 12	3.8
NH - 12	3.1
NH - 12	3.2
NH - 12	3.2
NH - 12	3.1
NH - 12	2.7
NH - 12	3.3
NH - 12	3
NH - 12	3.2
NH - 12	3.2
NH - 12	3.2
NH - 12	3.2
NH - 12	3.3
NH - 12	3.2
NH - 12	3.2
NH - 12	3.2
NH - 12	3.2
NH - 12	3.1
NH - 12	3.3
NH - 12	3
NH - 12	3.2

## Sheet: Nutrient Concentrations
Date	Tank	Treatment	Phase	Total N	Total P	Phosphate	Silicate	N+N	Ammonia
2022-06-25	1	A	Acclimation	7.511	0.286	0.188	5.112	0.279	0.17
2022-06-25	4	A	Acclimation	7.298	0.277	0.199	5.073	0.233	0.221
2022-06-25	11	A	Acclimation	7.032	0.282	0.186	9.753	0.269	0.203
2022-06-25	2	H	Acclimation	6.684	0.267	0.177	3.328	0.176	0.08
2022-06-25	6	H	Acclimation	6.795	0.229	0.175	5.456	0.191	0.121
2022-06-25	7	H	Acclimation	7.672	0.723	0.685	4.223	0.153	0.096
2022-06-25	5	N	Acclimation	5.195	0.351	0.328	3.503	0.289	0.293
2022-06-25	9	N	Acclimation	8.555	1.14	1.104	6.332	0.688	0.777
2022-06-25	10	N	Acclimation	7.784	0.612	0.505	6.55	0.507	0.501
2022-06-25	3	NH	Acclimation	7.478	0.522	0.442	4.665	0.314	0.294
2022-06-25	12	NH	Acclimation	5.523	0.624	0.607	4.18	0.346	0.296
2022-07-04	1	A	Acclimation	6.596	0.315	0.211	5.884	0.218	0.302
2022-07-04	4	A	Acclimation	6.265	0.353	0.291	4.435	0.17	0.375
2022-07-04	11	A	Acclimation	6.176	0.277	0.166	5.338	0.185	0.158
2022-07-04	5	N	Acclimation	7.019	0.657	0.541	4.328	0.427	0.38
2022-07-04	9	N	Acclimation	5.77	1.687	1.655	6.389	0.574	0.624
2022-07-04	10	N	Acclimation	5.8	0.615	0.569	7.691	0.658	0.723
2022-07-04	3	NH	Acclimation	7.709	0.951	0.925	4.291	0.55	0.359
2022-07-04	12	NH	Acclimation	5.753	1.125	1.06	5.293	0.398	0.416
2022-07-14	11	A	Heating	6.509	0.304	0.21	4.837	0.144	0.129
2022-07-14	6	H	Heating	6.891	0.275	0.187	4.001	0.102	0.028
2022-07-14	7	H	Heating	6.986	1.356	1.296	5.882	0.083	0.05
2022-07-14	5	N	Heating	9.224	0.661	0.582	3.961	0.899	0.9
2022-07-14	9	N	Heating	8.906	1.361	1.342	5.901	1.041	1.288
2022-07-14	10	N	Heating	8.651	0.698	0.638	5.581	1.131	1.303
2022-07-14	3	NH	Heating	8.362	0.852	0.83	4.208	1.006	0.804
2022-07-14	12	NH	Heating	8.974	1.212	1.188	4.65	0.641	1.044
2022-07-14	field	INTAKE	Heating	6.884	1.149	1.056	11.437	0.442	0.205
2022-07-22	1	A	Heating	4.357	0.272	0.118	3.174	0.062	0.02
2022-07-22	4	A	Heating	3.158	0.341	0.288	2.606	0.032	0.02
2022-07-22	11	A	Heating	3.621	0.184	0.073	3.019	0.033	0.02
2022-07-22	2	H	Heating	7.078	0.466	0.273	8.928	0.146	0.292
2022-07-22	6	H	Heating	4.873	0.362	0.246	4.232	0.06	0.02
2022-07-22	7	H	Heating	3.815	0.644	0.63	3.05	0.037	0.02
2022-07-22	5	N	Heating	4.096	0.37	0.318	2.759	0.275	0.287
2022-07-22	9	N	Heating	5.391	0.849	0.833	5.223	0.667	1.27
2022-07-22	10	N	Heating	4.808	0.375	0.289	3.783	0.445	0.599
2022-07-22	3	NH	Heating	6.926	0.658	0.589	3.082	1.799	1.951
2022-07-22	12	NH	Heating	3.406	0.44	0.446	2.496	0.178	0.099
2022-07-29	1	A	Heating	4.068	0.199	0.127	2.901	0.035	0.181
2022-07-29	11	A	Heating	3.61	0.191	0.09	2.434	0.046	0.137
2022-07-29	7	H	Heating	4.498	1.286	1.175	5.151	0.049	0.314
2022-07-29	5	N	Heating	4.824	0.399	0.324	2.087	0.212	0.378
2022-07-29	9	N	Heating	4.945	0.827	0.802	4.072	0.3	0.341
2022-07-29	10	N	Heating	5.138	0.412	0.344	3.879	0.41	0.485
2022-07-29	3	NH	Heating	4.82	0.606	0.567	2.515	0.315	0.349
2022-07-29	12	NH	Heating	4.339	0.457	0.363	2.396	0.153	0.302
2022-07-29	field	SB	Heating	3.624	0.183	0.069	10.102	0.03	0.112
2022-08-04	4	A	Heating	8.382	0.425	0.278	5.835	0.091	0.14
2022-08-04	11	A	Heating	7.634	0.316	0.197	3.596	0.059	0.342
2022-08-04	2	H	Heating	8.964	0.504	0.364	8.349	0.148	0.613
2022-08-04	6	H	Heating	8.594	0.283	0.154	5.248	0.084	0.209
2022-08-04	7	H	Heating	9.286	1.228	1.154	5.401	0.066	0.251
2022-08-04	5	N	Heating	11.282	1.013	0.862	5.659	0.715	1.018
2022-08-04	9	N	Heating	11.321	1.943	1.855	7.117	1.551	1.682
2022-08-04	10	N	Heating	12.044	1.108	0.977	7.991	1.859	2.411
2022-08-04	3	NH	Heating	10.833	4.457	4.403	4.962	1.164	1.364
2022-08-04	12	NH	Heating	15.064	1.52	1.364	6.779	1.279	2.577
2022-08-04	field	INTAKE	Heating	7.505	0.338	0.222	9.079	0.176	0.064
2022-08-04	field	SB	Heating	7.508	0.309	0.16	9.679	0.049	0.022
2022-08-12	1	A	Heating	8.125	0.328	0.166	7.149	0.222	0.272
2022-08-12	4	A	Heating	6.724	0.256	0.143	4.998	0.129	0.12
2022-08-12	11	A	Heating	7.856	0.349	0.167	3.831	0.113	0.166
2022-08-12	7	H	Heating	7.994	0.323	0.167	4.702	0.127	0.273
2022-08-12	5	N	Heating	9.932	1.232	1.171	5.537	0.877	1.675
2022-08-12	9	N	Heating	9.45	1.867	1.839	6.525	0.743	1.477
2022-08-12	10	N	Heating	5.146	0.985	0.917	4.949	0.675	1.671
2022-08-12	3	NH	Heating	9.027	1.068	0.964	3.952	0.562	1.177
2022-08-12	12	NH	Heating	9.734	1.447	1.347	4.457	0.611	1.498
2022-08-12	field	SB	Heating	7.638	0.334	0.171	10.593	0.046	0.037

## Sheet: Temperature
Date	Time	Period	Treatment	Temp
2019-06-06	12:00:00	Acclimating	A	27.825
2019-06-06	12:00:00	Acclimating	A	29.14
2019-06-06	12:00:00	Acclimating	A	28.568
2019-06-06	12:30:00	Acclimating	A	27.974
2019-06-06	12:30:00	Acclimating	A	29.315
2019-06-06	12:30:00	Acclimating	A	29.215
2019-06-06	13:00:00	Acclimating	A	27.949
2019-06-06	13:00:00	Acclimating	A	29.04
2019-06-06	13:00:00	Acclimating	A	29.09
2019-06-06	13:30:00	Acclimating	A	27.924
2019-06-06	13:30:00	Acclimating	A	29.165
2019-06-06	13:30:00	Acclimating	A	28.816
2019-06-06	14:00:00	Acclimating	A	27.899
2019-06-06	14:00:00	Acclimating	A	28.891
2019-06-06	14:00:00	Acclimating	A	28.891
2019-06-06	14:30:00	Acclimating	A	27.875
2019-06-06	14:30:00	Acclimating	A	29.265
2019-06-06	14:30:00	Acclimating	A	29.09
2019-06-06	15:00:00	Acclimating	A	27.875
2019-06-06	15:00:00	Acclimating	A	29.24
2019-06-06	15:00:00	Acclimating	A	29.065
2019-06-06	15:30:00	Acclimating	A	27.85
2019-06-06	15:30:00	Acclimating	A	29.14
2019-06-06	15:30:00	Acclimating	A	28.941
2019-06-06	16:00:00	Acclimating	A	27.702
2019-06-06	16:00:00	Acclimating	A	28.419
2019-06-06	16:00:00	Acclimating	A	28.692
2019-06-06	16:30:00	Acclimating	A	27.604
2019-06-06	16:30:00	Acclimating	A	28.171
2019-06-06	16:30:00	Acclimating	A	28.369
2019-06-06	17:00:00	Acclimating	A	27.505
2019-06-06	17:00:00	Acclimating	A	27.677
2019-06-06	17:00:00	Acclimating	A	27.974
2019-06-06	17:30:00	Acclimating	A	27.407
2019-06-06	17:30:00	Acclimating	A	27.554
2019-06-06	17:30:00	Acclimating	A	27.653
2019-06-06	18:00:00	Acclimating	A	27.358
2019-06-06	18:00:00	Acclimating	A	27.333
2019-06-06	18:00:00	Acclimating	A	27.481
2019-06-06	18:30:00	Acclimating	A	27.308
2019-06-06	18:30:00	Acclimating	A	27.235
2019-06-06	18:30:00	Acclimating	A	27.333
2019-06-06	19:00:00	Acclimating	A	27.308
2019-06-06	19:00:00	Acclimating	A	27.186
2019-06-06	19:00:00	Acclimating	A	27.259
2019-06-06	19:30:00	Acclimating	A	27.333
2019-06-06	19:30:00	Acclimating	A	27.161
2019-06-06	19:30:00	Acclimating	A	27.21
2019-06-06	20:00:00	Acclimating	A	27.308
2019-06-06	20:00:00	Acclimating	A	27.136
2019-06-06	20:00:00	Acclimating	A	27.161
2019-06-06	20:30:00	Acclimating	A	27.284
2019-06-06	20:30:00	Acclimating	A	27.112
2019-06-06	20:30:00	Acclimating	A	27.112
2019-06-06	21:00:00	Acclimating	A	27.284
2019-06-06	21:00:00	Acclimating	A	27.112
2019-06-06	21:00:00	Acclimating	A	27.087
2019-06-06	21:30:00	Acclimating	A	27.308
2019-06-06	21:30:00	Acclimating	A	27.136
2019-06-06	21:30:00	Acclimating	A	27.112
2019-06-06	22:00:00	Acclimating	A	27.333
2019-06-06	22:00:00	Acclimating	A	27.136
2019-06-06	22:00:00	Acclimating	A	27.112
2019-06-06	22:30:00	Acclimating	A	27.333
2019-06-06	22:30:00	Acclimating	A	27.112
2019-06-06	22:30:00	Acclimating	A	27.087
2019-06-06	23:00:00	Acclimating	A	27.308
2019-06-06	23:00:00	Acclimating	A	27.087
2019-06-06	23:00:00	Acclimating	A	27.063
2019-06-06	23:30:00	Acclimating	A	27.259
2019-06-06	23:30:00	Acclimating	A	27.063
2019-06-06	23:30:00	Acclimating	A	27.038
2019-06-07	00:00:00	Acclimating	A	27.235
2019-06-07	00:00:00	Acclimating	A	27.014
2019-06-07	00:00:00	Acclimating	A	26.989
2019-06-07	00:30:00	Acclimating	A	27.235
2019-06-07	00:30:00	Acclimating	A	27.014
2019-06-07	00:30:00	Acclimating	A	26.989
2019-06-07	01:00:00	Acclimating	A	27.21
2019-06-07	01:00:00	Acclimating	A	26.989
2019-06-07	01:00:00	Acclimating	A	26.989
2019-06-07	01:30:00	Acclimating	A	27.186
2019-06-07	01:30:00	Acclimating	A	26.965
2019-06-07	01:30:00	Acclimating	A	26.965
2019-06-07	02:00:00	Acclimating	A	27.161
2019-06-07	02:00:00	Acclimating	A	26.94
2019-06-07	02:00:00	Acclimating	A	26.916
2019-06-07	02:30:00	Acclimating	A	27.161
2019-06-07	02:30:00	Acclimating	A	26.94
2019-06-07	02:30:00	Acclimating	A	26.891
2019-06-07	03:00:00	Acclimating	A	27.136
2019-06-07	03:00:00	Acclimating	A	26.916
2019-06-07	03:00:00	Acclimating	A	26.891
2019-06-07	03:30:00	Acclimating	A	27.112
2019-06-07	03:30:00	Acclimating	A	26.94
2019-06-07	03:30:00	Acclimating	A	26.891
2019-06-07	04:00:00	Acclimating	A	27.112
2019-06-07	04:00:00	Acclimating	A	26.891
2019-06-07	04:00:00	Acclimating	A	26.867
2019-06-07	04:30:00	Acclimating	A	27.087
2019-06-07	04:30:00	Acclimating	A	26.891
2019-06-07	04:30:00	Acclimating	A	26.867
2019-06-07	05:00:00	Acclimating	A	27.087
2019-06-07	05:00:00	Acclimating	A	26.891
2019-06-07	05:00:00	Acclimating	A	26.867
2019-06-07	05:30:00	Acclimating	A	27.063
2019-06-07	05:30:00	Acclimating	A	26.867
2019-06-07	05:30:00	Acclimating	A	26.842
2019-06-07	06:00:00	Acclimating	A	27.063
2019-06-07	06:00:00	Acclimating	A	26.916
2019-06-07	06:00:00	Acclimating	A	26.891
2019-06-07	06:30:00	Acclimating	A	27.087
2019-06-07	06:30:00	Acclimating	A	26.989
2019-06-07	06:30:00	Acclimating	A	26.891
2019-06-07	07:00:00	Acclimating	A	27.136
2019-06-07	07:00:00	Acclimating	A	27.136
2019-06-07	07:00:00	Acclimating	A	27.014
2019-06-07	07:30:00	Acclimating	A	27.21
2019-06-07	07:30:00	Acclimating	A	27.554
2019-06-07	07:30:00	Acclimating	A	27.186
2019-06-07	08:00:00	Acclimating	A	27.259
2019-06-07	08:00:00	Acclimating	A	27.875
2019-06-07	08:00:00	Acclimating	A	27.382
2019-06-07	08:30:00	Acclimating	A	27.333
2019-06-07	08:30:00	Acclimating	A	28.171
2019-06-07	08:30:00	Acclimating	A	27.628
2019-06-07	09:00:00	Acclimating	A	27.382
2019-06-07	09:00:00	Acclimating	A	28.394
2019-06-07	09:00:00	Acclimating	A	27.751
2019-06-07	09:30:00	Acclimating	A	27.481
2019-06-07	09:30:00	Acclimating	A	28.692
2019-06-07	09:30:00	Acclimating	A	28.023
2019-06-07	10:00:00	Acclimating	A	27.628
2019-06-07	10:00:00	Acclimating	A	28.916
2019-06-07	10:00:00	Acclimating	A	28.295
2019-06-07	10:30:00	Acclimating	A	27.776
2019-06-07	10:30:00	Acclimating	A	29.165
2019-06-07	10:30:00	Acclimating	A	28.518
2019-06-07	11:00:00	Acclimating	A	27.899
2019-06-07	11:00:00	Acclimating	A	29.315
2019-06-07	11:00:00	Acclimating	A	28.717
2019-06-07	11:30:00	Acclimating	A	27.998
2019-06-07	11:30:00	Acclimating	A	29.515
2019-06-07	11:30:00	Acclimating	A	28.965
2019-06-07	12:00:00	Acclimating	A	28.097
2019-06-07	12:00:00	Acclimating	A	29.69
2019-06-07	12:00:00	Acclimating	A	29.115
2019-06-07	12:30:00	Acclimating	A	28.221
2019-06-07	12:30:00	Acclimating	A	29.916
2019-06-07	12:30:00	Acclimating	A	29.34
2019-06-07	13:00:00	Acclimating	A	28.345
2019-06-07	13:00:00	Acclimating	A	29.916
2019-06-07	13:00:00	Acclimating	A	29.439
2019-06-07	13:30:00	Acclimating	A	28.245
2019-06-07	13:30:00	Acclimating	A	29.315
2019-06-07	13:30:00	Acclimating	A	29.24
2019-06-07	14:00:00	Acclimating	A	28.122
2019-06-07	14:00:00	Acclimating	A	28.965
2019-06-07	14:00:00	Acclimating	A	28.866
2019-06-07	14:30:00	Acclimating	A	28.147
2019-06-07	14:30:00	Acclimating	A	28.916
2019-06-07	14:30:00	Acclimating	A	28.916
2019-06-07	15:00:00	Acclimating	A	28.072
2019-06-07	15:00:00	Acclimating	A	28.518
2019-06-07	15:00:00	Acclimating	A	28.568
2019-06-07	15:30:00	Acclimating	A	27.998
2019-06-07	15:30:00	Acclimating	A	28.295
2019-06-07	15:30:00	Acclimating	A	28.32
2019-06-07	16:00:00	Acclimating	A	27.924
2019-06-07	16:00:00	Acclimating	A	28.097
2019-06-07	16:00:00	Acclimating	A	28.122
2019-06-07	16:30:00	Acclimating	A	27.875
2019-06-07	16:30:00	Acclimating	A	27.899
2019-06-07	16:30:00	Acclimating	A	27.924
2019-06-07	17:00:00	Acclimating	A	27.85
2019-06-07	17:00:00	Acclimating	A	27.801
2019-06-07	17:00:00	Acclimating	A	27.825
2019-06-07	17:30:00	Acclimating	A	27.801
2019-06-07	17:30:00	Acclimating	A	27.727
2019-06-07	17:30:00	Acclimating	A	27.727
2019-06-07	18:00:00	Acclimating	A	27.776
2019-06-07	18:00:00	Acclimating	A	27.702
2019-06-07	18:00:00	Acclimating	A	27.628
2019-06-07	18:30:00	Acclimating	A	27.727
2019-06-07	18:30:00	Acclimating	A	27.628
2019-06-07	18:30:00	Acclimating	A	27.604
2019-06-07	19:00:00	Acclimating	A	27.677
2019-06-07	19:00:00	Acclimating	A	27.505
2019-06-07	19:00:00	Acclimating	A	27.53
2019-06-07	19:30:00	Acclimating	A	27.628
2019-06-07	19:30:00	Acclimating	A	27.431
2019-06-07	19:30:00	Acclimating	A	27.431
2019-06-07	20:00:00	Acclimating	A	27.554
2019-06-07	20:00:00	Acclimating	A	27.358
2019-06-07	20:00:00	Acclimating	A	27.358
2019-06-07	20:30:00	Acclimating	A	27.53
2019-06-07	20:30:00	Acclimating	A	27.333
2019-06-07	20:30:00	Acclimating	A	27.333
2019-06-07	21:00:00	Acclimating	A	27.505
2019-06-07	21:00:00	Acclimating	A	27.284
2019-06-07	21:00:00	Acclimating	A	27.284
2019-06-07	21:30:00	Acclimating	A	27.456
2019-06-07	21:30:00	Acclimating	A	27.259
2019-06-07	21:30:00	Acclimating	A	27.235
2019-06-07	22:00:00	Acclimating	A	27.456
2019-06-07	22:00:00	Acclimating	A	27.235
2019-06-07	22:00:00	Acclimating	A	27.21
2019-06-07	22:30:00	Acclimating	A	27.407
2019-06-07	22:30:00	Acclimating	A	27.21
2019-06-07	22:30:00	Acclimating	A	27.186
2019-06-07	23:00:00	Acclimating	A	27.382
2019-06-07	23:00:00	Acclimating	A	27.161
2019-06-07	23:00:00	Acclimating	A	27.136
2019-06-07	23:30:00	Acclimating	A	27.358
2019-06-07	23:30:00	Acclimating	A	27.161
2019-06-07	23:30:00	Acclimating	A	27.136
2019-06-08	00:00:00	Acclimating	A	27.333
2019-06-08	00:00:00	Acclimating	A	27.136
2019-06-08	00:00:00	Acclimating	A	27.112
2019-06-08	00:30:00	Acclimating	A	27.308
2019-06-08	00:30:00	Acclimating	A	27.087
2019-06-08	00:30:00	Acclimating	A	27.063
2019-06-08	01:00:00	Acclimating	A	27.284
2019-06-08	01:00:00	Acclimating	A	27.063
2019-06-08	01:00:00	Acclimating	A	27.038
2019-06-08	01:30:00	Acclimating	A	27.259
2019-06-08	01:30:00	Acclimating	A	27.038
2019-06-08	01:30:00	Acclimating	A	26.989
2019-06-08	02:00:00	Acclimating	A	27.284
2019-06-08	02:00:00	Acclimating	A	27.063
2019-06-08	02:00:00	Acclimating	A	26.989
2019-06-08	02:30:00	Acclimating	A	27.284
2019-06-08	02:30:00	Acclimating	A	27.038
2019-06-08	02:30:00	Acclimating	A	26.989
2019-06-08	03:00:00	Acclimating	A	27.259
2019-06-08	03:00:00	Acclimating	A	27.038
2019-06-08	03:00:00	Acclimating	A	26.989
2019-06-08	03:30:00	Acclimating	A	27.235
2019-06-08	03:30:00	Acclimating	A	27.014
2019-06-08	03:30:00	Acclimating	A	26.989
2019-06-08	04:00:00	Acclimating	A	27.21
2019-06-08	04:00:00	Acclimating	A	26.965
2019-06-08	04:00:00	Acclimating	A	26.94
2019-06-08	04:30:00	Acclimating	A	27.186
2019-06-08	04:30:00	Acclimating	A	26.965
2019-06-08	04:30:00	Acclimating	A	26.94
2019-06-08	05:00:00	Acclimating	A	27.161
2019-06-08	05:00:00	Acclimating	A	26.94
2019-06-08	05:00:00	Acclimating	A	26.916
2019-06-08	05:30:00	Acclimating	A	27.136
2019-06-08	05:30:00	Acclimating	A	26.916
2019-06-08	05:30:00	Acclimating	A	26.867
2019-06-08	06:00:00	Acclimating	A	27.136
2019-06-08	06:00:00	Acclimating	A	26.94
2019-06-08	06:00:00	Acclimating	A	26.891
2019-06-08	06:30:00	Acclimating	A	27.136
2019-06-08	06:30:00	Acclimating	A	26.989
2019-06-08	06:30:00	Acclimating	A	26.891
2019-06-08	07:00:00	Acclimating	A	27.21
2019-06-08	07:00:00	Acclimating	A	27.235
2019-06-08	07:00:00	Acclimating	A	27.038
2019-06-08	07:30:00	Acclimating	A	27.308
2019-06-08	07:30:00	Acclimating	A	27.628
2019-06-08	07:30:00	Acclimating	A	27.235
2019-06-08	08:00:00	Acclimating	A	27.358
2019-06-08	08:00:00	Acclimating	A	27.949
2019-06-08	08:00:00	Acclimating	A	27.358
2019-06-08	08:30:00	Acclimating	A	27.431
2019-06-08	08:30:00	Acclimating	A	28.295
2019-06-08	08:30:00	Acclimating	A	27.604
2019-06-08	09:00:00	Acclimating	A	27.554
2019-06-08	09:00:00	Acclimating	A	28.468
2019-06-08	09:00:00	Acclimating	A	27.875
2019-06-08	09:30:00	Acclimating	A	27.604
2019-06-08	09:30:00	Acclimating	A	28.122
2019-06-08	09:30:00	Acclimating	A	27.974
2019-06-08	10:00:00	Acclimating	A	27.579
2019-06-08	10:00:00	Acclimating	A	28.742
2019-06-08	10:00:00	Acclimating	A	27.825
2019-06-08	10:30:00	Acclimating	A	27.727
2019-06-08	10:30:00	Acclimating	A	28.891
2019-06-08	10:30:00	Acclimating	A	28.171
2019-06-08	11:00:00	Acclimating	A	27.899
2019-06-08	11:00:00	Acclimating	A	29.29
2019-06-08	11:00:00	Acclimating	A	28.568
2019-06-08	11:30:00	Acclimating	A	27.949
2019-06-08	11:30:00	Acclimating	A	29.464
2019-06-08	11:30:00	Acclimating	A	28.742
2019-06-08	12:00:00	Acclimating	A	28.048
2019-06-08	12:00:00	Acclimating	A	29.64
2019-06-08	12:00:00	Acclimating	A	28.941
2019-06-08	12:30:00	Acclimating	A	28.122
2019-06-08	12:30:00	Acclimating	A	29.59
2019-06-08	12:30:00	Acclimating	A	29.115
2019-06-08	13:00:00	Acclimating	A	27.974
2019-06-08	13:00:00	Acclimating	A	28.99
2019-06-08	13:00:00	Acclimating	A	28.816
2019-06-08	13:30:00	Acclimating	A	27.974
2019-06-08	13:30:00	Acclimating	A	28.766
2019-06-08	13:30:00	Acclimating	A	28.941
2019-06-08	14:00:00	Acclimating	A	27.949
2019-06-08	14:00:00	Acclimating	A	28.766
2019-06-08	14:00:00	Acclimating	A	28.916
2019-06-08	14:30:00	Acclimating	A	27.825
2019-06-08	14:30:00	Acclimating	A	28.468
2019-06-08	14:30:00	Acclimating	A	28.543
2019-06-08	15:00:00	Acclimating	A	27.776
2019-06-08	15:00:00	Acclimating	A	28.493
2019-06-08	15:00:00	Acclimating	A	28.27
2019-06-08	15:30:00	Acclimating	A	27.85
2019-06-08	15:30:00	Acclimating	A	28.072
2019-06-08	15:30:00	Acclimating	A	28.196
2019-06-08	16:00:00	Acclimating	A	27.776
2019-06-08	16:00:00	Acclimating	A	27.949
2019-06-08	16:00:00	Acclimating	A	27.974
2019-06-08	16:30:00	Acclimating	A	27.653
2019-06-08	16:30:00	Acclimating	A	27.875
2019-06-08	16:30:00	Acclimating	A	27.825
2019-06-08	17:00:00	Acclimating	A	27.653
2019-06-08	17:00:00	Acclimating	A	27.702
2019-06-08	17:00:00	Acclimating	A	27.776
2019-06-08	17:30:00	Acclimating	A	27.628
2019-06-08	17:30:00	Acclimating	A	27.579
2019-06-08	17:30:00	Acclimating	A	27.628
2019-06-08	18:00:00	Acclimating	A	27.554
2019-06-08	18:00:00	Acclimating	A	27.456
2019-06-08	18:00:00	Acclimating	A	27.481
2019-06-08	18:30:00	Acclimating	A	27.53
2019-06-08	18:30:00	Acclimating	A	27.382
2019-06-08	18:30:00	Acclimating	A	27.382
2019-06-08	19:00:00	Acclimating	A	27.481
2019-06-08	19:00:00	Acclimating	A	27.284
2019-06-08	19:00:00	Acclimating	A	27.308
2019-06-08	19:30:00	Acclimating	A	27.456
2019-06-08	19:30:00	Acclimating	A	27.284
2019-06-08	19:30:00	Acclimating	A	27.259
2019-06-08	20:00:00	Acclimating	A	27.53
2019-06-08	20:00:00	Acclimating	A	27.333
2019-06-08	20:00:00	Acclimating	A	27.308
2019-06-08	20:30:00	Acclimating	A	27.481
2019-06-08	20:30:00	Acclimating	A	27.259
2019-06-08	20:30:00	Acclimating	A	27.235
2019-06-08	21:00:00	Acclimating	A	27.407
2019-06-08	21:00:00	Acclimating	A	27.186
2019-06-08	21:00:00	Acclimating	A	27.186
2019-06-08	21:30:00	Acclimating	A	27.358
2019-06-08	21:30:00	Acclimating	A	27.161
2019-06-08	21:30:00	Acclimating	A	27.136
2019-06-08	22:00:00	Acclimating	A	27.333
2019-06-08	22:00:00	Acclimating	A	27.112
2019-06-08	22:00:00	Acclimating	A	27.087
2019-06-08	22:30:00	Acclimating	A	27.284
2019-06-08	22:30:00	Acclimating	A	27.063
2019-06-08	22:30:00	Acclimating	A	27.063
2019-06-08	23:00:00	Acclimating	A	27.259
2019-06-08	23:00:00	Acclimating	A	27.038
2019-06-08	23:00:00	Acclimating	A	27.014
2019-06-08	23:30:00	Acclimating	A	27.259
2019-06-08	23:30:00	Acclimating	A	27.038
2019-06-08	23:30:00	Acclimating	A	27.014
2019-06-09	00:00:00	Acclimating	A	27.259
2019-06-09	00:00:00	Acclimating	A	27.038
2019-06-09	00:00:00	Acclimating	A	27.038
2019-06-09	00:30:00	Acclimating	A	27.235
2019-06-09	00:30:00	Acclimating	A	27.038
2019-06-09	00:30:00	Acclimating	A	27.038
2019-06-09	01:00:00	Acclimating	A	27.235
2019-06-09	01:00:00	Acclimating	A	27.063
2019-06-09	01:00:00	Acclimating	A	27.038
2019-06-09	01:30:00	Acclimating	A	27.259
2019-06-09	01:30:00	Acclimating	A	27.087
2019-06-09	01:30:00	Acclimating	A	27.087
2019-06-09	02:00:00	Acclimating	A	27.259
2019-06-09	02:00:00	Acclimating	A	27.112
2019-06-09	02:00:00	Acclimating	A	27.112
2019-06-09	02:30:00	Acclimating	A	27.235
2019-06-09	02:30:00	Acclimating	A	27.112
2019-06-09	02:30:00	Acclimating	A	27.112
2019-06-09	03:00:00	Acclimating	A	27.21
2019-06-09	03:00:00	Acclimating	A	27.038
2019-06-09	03:00:00	Acclimating	A	27.063
2019-06-09	03:30:00	Acclimating	A	27.21
2019-06-09	03:30:00	Acclimating	A	27.038
2019-06-09	03:30:00	Acclimating	A	27.063
2019-06-09	04:00:00	Acclimating	A	27.161
2019-06-09	04:00:00	Acclimating	A	27.038
2019-06-09	04:00:00	Acclimating	A	27.014
2019-06-09	04:30:00	Acclimating	A	27.161
2019-06-09	04:30:00	Acclimating	A	27.014
2019-06-09	04:30:00	Acclimating	A	27.014
2019-06-09	05:00:00	Acclimating	A	27.136
2019-06-09	05:00:00	Acclimating	A	26.989
2019-06-09	05:00:00	Acclimating	A	27.014
2019-06-09	05:30:00	Acclimating	A	27.112
2019-06-09	05:30:00	Acclimating	A	26.94
2019-06-09	05:30:00	Acclimating	A	26.965
2019-06-09	06:00:00	Acclimating	A	27.112
2019-06-09	06:00:00	Acclimating	A	26.989
2019-06-09	06:00:00	Acclimating	A	26.965
2019-06-09	06:30:00	Acclimating	A	27.136
2019-06-09	06:30:00	Acclimating	A	27.112
2019-06-09	06:30:00	Acclimating	A	26.989
2019-06-09	07:00:00	Acclimating	A	27.21
2019-06-09	07:00:00	Acclimating	A	27.308
2019-06-09	07:00:00	Acclimating	A	27.087
2019-06-09	07:30:00	Acclimating	A	27.308
2019-06-09	07:30:00	Acclimating	A	27.702
2019-06-09	07:30:00	Acclimating	A	27.308
2019-06-09	08:00:00	Acclimating	A	27.407
2019-06-09	08:00:00	Acclimating	A	28.048
2019-06-09	08:00:00	Acclimating	A	27.505
2019-06-09	08:30:00	Acclimating	A	27.53
2019-06-09	08:30:00	Acclimating	A	28.468
2019-06-09	08:30:00	Acclimating	A	27.727
2019-06-09	09:00:00	Acclimating	A	27.677
2019-06-09	09:00:00	Acclimating	A	28.742
2019-06-09	09:00:00	Acclimating	A	28.023
2019-06-09	09:30:00	Acclimating	A	27.825
2019-06-09	09:30:00	Acclimating	A	28.965
2019-06-09	09:30:00	Acclimating	A	28.27
2019-06-09	10:00:00	Acclimating	A	27.924
2019-06-09	10:00:00	Acclimating	A	29.265
2019-06-09	10:00:00	Acclimating	A	28.444
2019-06-09	10:30:00	Acclimating	A	28.493
2019-06-09	10:30:00	Acclimating	A	28.866
2019-06-09	10:30:00	Acclimating	A	28.742
2019-06-09	11:00:00	Acclimating	A	28.866
2019-06-09	11:00:00	Acclimating	A	29.565
2019-06-09	11:00:00	Acclimating	A	28.916
2019-06-09	11:30:00	Acclimating	A	29.315
2019-06-09	11:30:00	Acclimating	A	29.84
2019-06-09	11:30:00	Acclimating	A	29.24
2019-06-09	12:00:00	Acclimating	A	29.59
2019-06-09	12:00:00	Acclimating	A	30.041
2019-06-09	12:00:00	Acclimating	A	29.54
2019-06-09	12:30:00	Acclimating	A	29.665
2019-06-09	12:30:00	Acclimating	A	30.041
2019-06-09	12:30:00	Acclimating	A	29.64
2019-06-09	13:00:00	Acclimating	A	29.615
2019-06-09	13:00:00	Acclimating	A	29.665
2019-06-09	13:00:00	Acclimating	A	29.49
2019-06-09	13:30:00	Acclimating	A	28.916
2019-06-09	13:30:00	Acclimating	A	28.742
2019-06-09	13:30:00	Acclimating	A	28.965
2019-06-09	14:00:00	Acclimating	A	29.065
2019-06-09	14:00:00	Acclimating	A	28.841
2019-06-09	14:00:00	Acclimating	A	28.891
2019-06-09	14:30:00	Acclimating	A	28.568
2019-06-09	14:30:00	Acclimating	A	29.165
2019-06-09	14:30:00	Acclimating	A	28.791
2019-06-09	15:00:00	Acclimating	A	28.295
2019-06-09	15:00:00	Acclimating	A	28.617
2019-06-09	15:00:00	Acclimating	A	28.617
2019-06-09	15:30:00	Acclimating	A	28.147
2019-06-09	15:30:00	Acclimating	A	28.791
2019-06-09	15:30:00	Acclimating	A	28.419
2019-06-09	16:00:00	Acclimating	A	28.147
2019-06-09	16:00:00	Acclimating	A	28.891
2019-06-09	16:00:00	Acclimating	A	28.518
2019-06-09	16:30:00	Acclimating	A	28.196
2019-06-09	16:30:00	Acclimating	A	28.667
2019-06-09	16:30:00	Acclimating	A	28.667
2019-06-09	17:00:00	Acclimating	A	28.171
2019-06-09	17:00:00	Acclimating	A	28.369
2019-06-09	17:00:00	Acclimating	A	28.419
2019-06-09	17:30:00	Acclimating	A	28.097
2019-06-09	17:30:00	Acclimating	A	28.171
2019-06-09	17:30:00	Acclimating	A	28.221
2019-06-09	18:00:00	Acclimating	A	28.023
2019-06-09	18:00:00	Acclimating	A	27.998
2019-06-09	18:00:00	Acclimating	A	28.048
2019-06-09	18:30:00	Acclimating	A	27.974
2019-06-09	18:30:00	Acclimating	A	27.875
2019-06-09	18:30:00	Acclimating	A	27.924
2019-06-09	19:00:00	Acclimating	A	27.924
2019-06-09	19:00:00	Acclimating	A	27.776
2019-06-09	19:00:00	Acclimating	A	27.801
2019-06-09	19:30:00	Acclimating	A	27.899
2019-06-09	19:30:00	Acclimating	A	27.727
2019-06-09	19:30:00	Acclimating	A	27.727
2019-06-09	20:00:00	Acclimating	A	27.875
2019-06-09	20:00:00	Acclimating	A	27.677
2019-06-09	20:00:00	Acclimating	A	27.653
2019-06-09	20:30:00	Acclimating	A	27.85
2019-06-09	20:30:00	Acclimating	A	27.653
2019-06-09	20:30:00	Acclimating	A	27.628
2019-06-09	21:00:00	Acclimating	A	27.801
2019-06-09	21:00:00	Acclimating	A	27.604
2019-06-09	21:00:00	Acclimating	A	27.579
2019-06-09	21:30:00	Acclimating	A	27.751
2019-06-09	21:30:00	Acclimating	A	27.554
2019-06-09	21:30:00	Acclimating	A	27.53
2019-06-09	22:00:00	Acclimating	A	27.727
2019-06-09	22:00:00	Acclimating	A	27.554
2019-06-09	22:00:00	Acclimating	A	27.505
2019-06-09	22:30:00	Acclimating	A	27.702
2019-06-09	22:30:00	Acclimating	A	27.53
2019-06-09	22:30:00	Acclimating	A	27.53
2019-06-09	23:00:00	Acclimating	A	27.677
2019-06-09	23:00:00	Acclimating	A	27.53
2019-06-09	23:00:00	Acclimating	A	27.505
2019-06-09	23:30:00	Acclimating	A	27.677
2019-06-09	23:30:00	Acclimating	A	27.505
2019-06-09	23:30:00	Acclimating	A	27.481
2019-06-10	00:00:00	Acclimating	A	27.653
2019-06-10	00:00:00	Acclimating	A	27.481
2019-06-10	00:00:00	Acclimating	A	27.481
2019-06-10	00:30:00	Acclimating	A	27.628
2019-06-10	00:30:00	Acclimating	A	27.505
2019-06-10	00:30:00	Acclimating	A	27.481
2019-06-10	01:00:00	Acclimating	A	27.628
2019-06-10	01:00:00	Acclimating	A	27.456
2019-06-10	01:00:00	Acclimating	A	27.456
2019-06-10	01:30:00	Acclimating	A	27.604
2019-06-10	01:30:00	Acclimating	A	27.431
2019-06-10	01:30:00	Acclimating	A	27.431
2019-06-10	02:00:00	Acclimating	A	27.554
2019-06-10	02:00:00	Acclimating	A	27.407
2019-06-10	02:00:00	Acclimating	A	27.407
2019-06-10	02:30:00	Acclimating	A	27.53
2019-06-10	02:30:00	Acclimating	A	27.358
2019-06-10	02:30:00	Acclimating	A	27.382
2019-06-10	03:00:00	Acclimating	A	27.505
2019-06-10	03:00:00	Acclimating	A	27.333
2019-06-10	03:00:00	Acclimating	A	27.333
2019-06-10	03:30:00	Acclimating	A	27.505
2019-06-10	03:30:00	Acclimating	A	27.308
2019-06-10	03:30:00	Acclimating	A	27.284
2019-06-10	04:00:00	Acclimating	A	27.505
2019-06-10	04:00:00	Acclimating	A	27.308
2019-06-10	04:00:00	Acclimating	A	27.259
2019-06-10	04:30:00	Acclimating	A	27.53
2019-06-10	04:30:00	Acclimating	A	27.333
2019-06-10	04:30:00	Acclimating	A	27.284
2019-06-10	05:00:00	Acclimating	A	27.53
2019-06-10	05:00:00	Acclimating	A	27.382
2019-06-10	05:00:00	Acclimating	A	27.333
2019-06-10	05:30:00	Acclimating	A	27.53
2019-06-10	05:30:00	Acclimating	A	27.358
2019-06-10	05:30:00	Acclimating	A	27.333
2019-06-10	06:00:00	Acclimating	A	27.53
2019-06-10	06:00:00	Acclimating	A	27.382
2019-06-10	06:00:00	Acclimating	A	27.333
2019-06-10	06:30:00	Acclimating	A	27.554
2019-06-10	06:30:00	Acclimating	A	27.505
2019-06-10	06:30:00	Acclimating	A	27.358
2019-06-10	07:00:00	Acclimating	A	27.604
2019-06-10	07:00:00	Acclimating	A	27.653
2019-06-10	07:00:00	Acclimating	A	27.431
2019-06-10	07:30:00	Acclimating	A	27.677
2019-06-10	07:30:00	Acclimating	A	27.974
2019-06-10	07:30:00	Acclimating	A	27.604
2019-06-10	08:00:00	Acclimating	A	27.751
2019-06-10	08:00:00	Acclimating	A	28.27
2019-06-10	08:00:00	Acclimating	A	27.801
2019-06-10	08:30:00	Acclimating	A	28.171
2019-06-10	08:30:00	Acclimating	A	28.617
2019-06-10	08:30:00	Acclimating	A	28.072
2019-06-10	09:00:00	Acclimating	A	28.444
2019-06-10	09:00:00	Acclimating	A	29.04
2019-06-10	09:00:00	Acclimating	A	28.32
2019-06-10	09:30:00	Acclimating	A	28.642
2019-06-10	09:30:00	Acclimating	A	29.439
2019-06-10	09:30:00	Acclimating	A	28.543
2019-06-10	10:00:00	Acclimating	A	28.916
2019-06-10	10:00:00	Acclimating	A	29.765
2019-06-10	10:00:00	Acclimating	A	28.766
2019-06-10	10:30:00	Acclimating	A	29.215
2019-06-10	10:30:00	Acclimating	A	30.066
2019-06-10	10:30:00	Acclimating	A	29.015
2019-06-10	11:00:00	Acclimating	A	28.99
2019-06-10	11:00:00	Acclimating	A	30.268
2019-06-10	11:00:00	Acclimating	A	28.99
2019-06-10	11:30:00	Acclimating	A	28.891
2019-06-10	11:30:00	Acclimating	A	30.091
2019-06-10	11:30:00	Acclimating	A	28.941
2019-06-10	12:00:00	Acclimating	A	28.891
2019-06-10	12:00:00	Acclimating	A	30.217
2019-06-10	12:00:00	Acclimating	A	28.99
2019-06-10	12:30:00	Acclimating	A	28.916
2019-06-10	12:30:00	Acclimating	A	30.192
2019-06-10	12:30:00	Acclimating	A	29.04
2019-06-10	13:00:00	Acclimating	A	28.717
2019-06-10	13:00:00	Acclimating	A	29.14
2019-06-10	13:00:00	Acclimating	A	28.841
2019-06-10	13:30:00	Acclimating	A	28.468
2019-06-10	13:30:00	Acclimating	A	28.717
2019-06-10	13:30:00	Acclimating	A	28.593
2019-06-10	14:00:00	Acclimating	A	28.493
2019-06-10	14:00:00	Acclimating	A	29.515
2019-06-10	14:00:00	Acclimating	A	28.617
2019-06-10	14:30:00	Acclimating	A	28.617
2019-06-10	14:30:00	Acclimating	A	29.665
2019-06-10	14:30:00	Acclimating	A	28.791
2019-06-10	15:00:00	Acclimating	A	28.642
2019-06-10	15:00:00	Acclimating	A	29.74
2019-06-10	15:00:00	Acclimating	A	28.916
2019-06-10	15:30:00	Acclimating	A	28.667
2019-06-10	15:30:00	Acclimating	A	29.64
2019-06-10	15:30:00	Acclimating	A	28.916
2019-06-10	16:00:00	Acclimating	A	28.642
2019-06-10	16:00:00	Acclimating	A	29.115
2019-06-10	16:00:00	Acclimating	A	28.891
2019-06-10	16:30:00	Acclimating	A	28.593
2019-06-10	16:30:00	Acclimating	A	28.916
2019-06-10	16:30:00	Acclimating	A	28.717
2019-06-10	17:00:00	Acclimating	A	28.617
2019-06-10	17:00:00	Acclimating	A	28.667
2019-06-10	17:00:00	Acclimating	A	28.667
2019-06-10	17:30:00	Acclimating	A	28.568
2019-06-10	17:30:00	Acclimating	A	28.493
2019-06-10	17:30:00	Acclimating	A	28.543
2019-06-10	18:00:00	Acclimating	A	28.468
2019-06-10	18:00:00	Acclimating	A	28.419
2019-06-10	18:00:00	Acclimating	A	28.394
2019-06-10	18:30:00	Acclimating	A	28.345
2019-06-10	18:30:00	Acclimating	A	28.27
2019-06-10	18:30:00	Acclimating	A	28.32
2019-06-10	19:00:00	Acclimating	A	28.245
2019-06-10	19:00:00	Acclimating	A	28.196
2019-06-10	19:00:00	Acclimating	A	28.196
2019-06-10	19:30:00	Acclimating	A	28.171
2019-06-10	19:30:00	Acclimating	A	28.122
2019-06-10	19:30:00	Acclimating	A	28.122
2019-06-10	20:00:00	Acclimating	A	28.122
2019-06-10	20:00:00	Acclimating	A	28.097
2019-06-10	20:00:00	Acclimating	A	28.072
2019-06-10	20:30:00	Acclimating	A	28.072
2019-06-10	20:30:00	Acclimating	A	28.023
2019-06-10	20:30:00	Acclimating	A	28.023
2019-06-10	21:00:00	Acclimating	A	27.998
2019-06-10	21:00:00	Acclimating	A	27.974
2019-06-10	21:00:00	Acclimating	A	27.924
2019-06-10	21:30:00	Acclimating	A	27.974
2019-06-10	21:30:00	Acclimating	A	27.899
2019-06-10	21:30:00	Acclimating	A	27.875
2019-06-10	22:00:00	Acclimating	A	27.924
2019-06-10	22:00:00	Acclimating	A	27.875
2019-06-10	22:00:00	Acclimating	A	27.825
2019-06-10	22:30:00	Acclimating	A	27.924
2019-06-10	22:30:00	Acclimating	A	27.875
2019-06-10	22:30:00	Acclimating	A	27.825
2019-06-10	23:00:00	Acclimating	A	27.924
2019-06-10	23:00:00	Acclimating	A	27.875
2019-06-10	23:00:00	Acclimating	A	27.776
2019-06-10	23:30:00	Acclimating	A	27.924
2019-06-10	23:30:00	Acclimating	A	27.875
2019-06-10	23:30:00	Acclimating	A	27.801
2019-06-11	00:00:00	Acclimating	A	27.875
2019-06-11	00:00:00	Acclimating	A	27.85
2019-06-11	00:00:00	Acclimating	A	27.776
2019-06-11	00:30:00	Acclimating	A	27.875
2019-06-11	00:30:00	Acclimating	A	27.825
2019-06-11	00:30:00	Acclimating	A	27.751
2019-06-11	01:00:00	Acclimating	A	27.85
2019-06-11	01:00:00	Acclimating	A	27.776
2019-06-11	01:00:00	Acclimating	A	27.727
2019-06-11	01:30:00	Acclimating	A	27.776
2019-06-11	01:30:00	Acclimating	A	27.702
2019-06-11	01:30:00	Acclimating	A	27.628
2019-06-11	02:00:00	Acclimating	A	27.776
2019-06-11	02:00:00	Acclimating	A	27.702
2019-06-11	02:00:00	Acclimating	A	27.604
2019-06-11	02:30:00	Acclimating	A	27.776
2019-06-11	02:30:00	Acclimating	A	27.702
2019-06-11	02:30:00	Acclimating	A	27.604
2019-06-11	03:00:00	Acclimating	A	27.751
2019-06-11	03:00:00	Acclimating	A	27.628
2019-06-11	03:00:00	Acclimating	A	27.579
2019-06-11	03:30:00	Acclimating	A	27.677
2019-06-11	03:30:00	Acclimating	A	27.579
2019-06-11	03:30:00	Acclimating	A	27.505
2019-06-11	04:00:00	Acclimating	A	27.604
2019-06-11	04:00:00	Acclimating	A	27.505
2019-06-11	04:00:00	Acclimating	A	27.431
2019-06-11	04:30:00	Acclimating	A	27.554
2019-06-11	04:30:00	Acclimating	A	27.456
2019-06-11	04:30:00	Acclimating	A	27.407
2019-06-11	05:00:00	Acclimating	A	27.505
2019-06-11	05:00:00	Acclimating	A	27.407
2019-06-11	05:00:00	Acclimating	A	27.333
2019-06-11	05:30:00	Acclimating	A	27.481
2019-06-11	05:30:00	Acclimating	A	27.407
2019-06-11	05:30:00	Acclimating	A	27.333
2019-06-11	06:00:00	Acclimating	A	27.456
2019-06-11	06:00:00	Acclimating	A	27.382
2019-06-11	06:00:00	Acclimating	A	27.333
2019-06-11	06:30:00	Acclimating	A	27.456
2019-06-11	06:30:00	Acclimating	A	27.382
2019-06-11	06:30:00	Acclimating	A	27.308
2019-06-11	07:00:00	Acclimating	A	27.579
2019-06-11	07:00:00	Acclimating	A	27.53
2019-06-11	07:00:00	Acclimating	A	27.407
2019-06-11	07:30:00	Acclimating	A	27.702
2019-06-11	07:30:00	Acclimating	A	27.751
2019-06-11	07:30:00	Acclimating	A	27.53
2019-06-11	08:00:00	Acclimating	A	27.801
2019-06-11	08:00:00	Acclimating	A	27.899
2019-06-11	08:00:00	Acclimating	A	27.653
2019-06-11	08:30:00	Acclimating	A	28.072
2019-06-11	08:30:00	Acclimating	A	28.369
2019-06-11	08:30:00	Acclimating	A	27.899
2019-06-11	09:00:00	Acclimating	A	28.32
2019-06-11	09:00:00	Acclimating	A	28.866
2019-06-11	09:00:00	Acclimating	A	28.147
2019-06-11	09:30:00	Acclimating	A	28.617
2019-06-11	09:30:00	Acclimating	A	29.04
2019-06-11	09:30:00	Acclimating	A	28.419
2019-06-11	10:00:00	Acclimating	A	28.941
2019-06-11	10:00:00	Acclimating	A	29.265
2019-06-11	10:00:00	Acclimating	A	28.468
2019-06-11	10:30:00	Acclimating	A	29.065
2019-06-11	10:30:00	Acclimating	A	29.439
2019-06-11	10:30:00	Acclimating	A	28.419
2019-06-11	11:00:00	Acclimating	A	29.065
2019-06-11	11:00:00	Acclimating	A	29.54
2019-06-11	11:00:00	Acclimating	A	28.468
2019-06-11	11:30:00	Acclimating	A	29.315
2019-06-11	11:30:00	Acclimating	A	29.79
2019-06-11	11:30:00	Acclimating	A	28.568
2019-06-11	12:00:00	Acclimating	A	29.464
2019-06-11	12:00:00	Acclimating	A	29.89
2019-06-11	12:00:00	Acclimating	A	28.692
2019-06-11	12:30:00	Acclimating	A	29.04
2019-06-11	12:30:00	Acclimating	A	29.615
2019-06-11	12:30:00	Acclimating	A	28.791
2019-06-11	13:00:00	Acclimating	A	28.866
2019-06-11	13:00:00	Acclimating	A	29.439
2019-06-11	13:00:00	Acclimating	A	28.816
2019-06-11	13:30:00	Acclimating	A	28.642
2019-06-11	13:30:00	Acclimating	A	29.715
2019-06-11	13:30:00	Acclimating	A	28.766
2019-06-11	14:00:00	Acclimating	A	28.493
2019-06-11	14:00:00	Acclimating	A	29.215
2019-06-11	14:00:00	Acclimating	A	28.791
2019-06-11	14:30:00	Acclimating	A	28.32
2019-06-11	14:30:00	Acclimating	A	28.493
2019-06-11	14:30:00	Acclimating	A	28.543
2019-06-11	15:00:00	Acclimating	A	28.345
2019-06-11	15:00:00	Acclimating	A	28.468
2019-06-11	15:00:00	Acclimating	A	28.518
2019-06-11	15:30:00	Acclimating	A	28.617
2019-06-11	15:30:00	Acclimating	A	28.642
2019-06-11	15:30:00	Acclimating	A	28.941
2019-06-11	16:00:00	Acclimating	A	28.667
2019-06-11	16:00:00	Acclimating	A	28.617
2019-06-11	16:00:00	Acclimating	A	29.065
2019-06-11	16:30:00	Acclimating	A	28.717
2019-06-11	16:30:00	Acclimating	A	28.543
2019-06-11	16:30:00	Acclimating	A	29.165
2019-06-11	17:00:00	Acclimating	A	28.543
2019-06-11	17:00:00	Acclimating	A	28.394
2019-06-11	17:00:00	Acclimating	A	28.866
2019-06-11	17:30:00	Acclimating	A	28.369
2019-06-11	17:30:00	Acclimating	A	28.32
2019-06-11	17:30:00	Acclimating	A	28.543
2019-06-11	18:00:00	Acclimating	A	28.245
2019-06-11	18:00:00	Acclimating	A	28.295
2019-06-11	18:00:00	Acclimating	A	28.345
2019-06-11	18:30:00	Acclimating	A	28.147
2019-06-11	18:30:00	Acclimating	A	28.245
2019-06-11	18:30:00	Acclimating	A	28.221
2019-06-11	19:00:00	Acclimating	A	28.023
2019-06-11	19:00:00	Acclimating	A	28.171
2019-06-11	19:00:00	Acclimating	A	28.072
2019-06-11	19:30:00	Acclimating	A	27.924
2019-06-11	19:30:00	Acclimating	A	28.097
2019-06-11	19:30:00	Acclimating	A	27.974
2019-06-11	20:00:00	Acclimating	A	27.801
2019-06-11	20:00:00	Acclimating	A	28.023
2019-06-11	20:00:00	Acclimating	A	27.85
2019-06-11	20:30:00	Acclimating	A	27.751
2019-06-11	20:30:00	Acclimating	A	27.949
2019-06-11	20:30:00	Acclimating	A	27.776
2019-06-11	21:00:00	Acclimating	A	27.727
2019-06-11	21:00:00	Acclimating	A	27.949
2019-06-11	21:00:00	Acclimating	A	27.727
2019-06-11	21:30:00	Acclimating	A	27.727
2019-06-11	21:30:00	Acclimating	A	27.949
2019-06-11	21:30:00	Acclimating	A	27.727
2019-06-11	22:00:00	Acclimating	A	27.702
2019-06-11	22:00:00	Acclimating	A	27.924
2019-06-11	22:00:00	Acclimating	A	27.727
2019-06-11	22:30:00	Acclimating	A	27.677
2019-06-11	22:30:00	Acclimating	A	27.899
2019-06-11	22:30:00	Acclimating	A	27.677
2019-06-11	23:00:00	Acclimating	A	27.677
2019-06-11	23:00:00	Acclimating	A	27.924
2019-06-11	23:00:00	Acclimating	A	27.677
2019-06-11	23:30:00	Acclimating	A	27.677
2019-06-11	23:30:00	Acclimating	A	27.924
2019-06-11	23:30:00	Acclimating	A	27.677
2019-06-12	00:00:00	Acclimating	A	27.677
2019-06-12	00:00:00	Acclimating	A	27.924
2019-06-12	00:00:00	Acclimating	A	27.677
2019-06-12	00:30:00	Acclimating	A	27.677
2019-06-12	00:30:00	Acclimating	A	27.899
2019-06-12	00:30:00	Acclimating	A	27.653
2019-06-12	01:00:00	Acclimating	A	27.677
2019-06-12	01:00:00	Acclimating	A	27.924
2019-06-12	01:00:00	Acclimating	A	27.653
2019-06-12	01:30:00	Acclimating	A	27.702
2019-06-12	01:30:00	Acclimating	A	27.899
2019-06-12	01:30:00	Acclimating	A	27.677
2019-06-12	02:00:00	Acclimating	A	27.677
2019-06-12	02:00:00	Acclimating	A	27.899
2019-06-12	02:00:00	Acclimating	A	27.653
2019-06-12	02:30:00	Acclimating	A	27.628
2019-06-12	02:30:00	Acclimating	A	27.85
2019-06-12	02:30:00	Acclimating	A	27.628
2019-06-12	03:00:00	Acclimating	A	27.579
2019-06-12	03:00:00	Acclimating	A	27.801
2019-06-12	03:00:00	Acclimating	A	27.579
2019-06-12	03:30:00	Acclimating	A	27.53
2019-06-12	03:30:00	Acclimating	A	27.751
2019-06-12	03:30:00	Acclimating	A	27.554
2019-06-12	04:00:00	Acclimating	A	27.481
2019-06-12	04:00:00	Acclimating	A	27.727
2019-06-12	04:00:00	Acclimating	A	27.53
2019-06-12	04:30:00	Acclimating	A	27.505
2019-06-12	04:30:00	Acclimating	A	27.727
2019-06-12	04:30:00	Acclimating	A	27.554
2019-06-12	05:00:00	Acclimating	A	27.481
2019-06-12	05:00:00	Acclimating	A	27.702
2019-06-12	05:00:00	Acclimating	A	27.53
2019-06-12	05:30:00	Acclimating	A	27.554
2019-06-12	05:30:00	Acclimating	A	27.727
2019-06-12	05:30:00	Acclimating	A	27.554
2019-06-12	06:00:00	Acclimating	A	27.579
2019-06-12	06:00:00	Acclimating	A	27.702
2019-06-12	06:00:00	Acclimating	A	27.554
2019-06-12	06:30:00	Acclimating	A	27.677
2019-06-12	06:30:00	Acclimating	A	27.677
2019-06-12	06:30:00	Acclimating	A	27.579
2019-06-12	07:00:00	Acclimating	A	27.727
2019-06-12	07:00:00	Acclimating	A	27.677
2019-06-12	07:00:00	Acclimating	A	27.628
2019-06-12	07:30:00	Acclimating	A	27.776
2019-06-12	07:30:00	Acclimating	A	27.677
2019-06-12	07:30:00	Acclimating	A	27.653
2019-06-12	08:00:00	Acclimating	A	27.924
2019-06-12	08:00:00	Acclimating	A	27.751
2019-06-12	08:00:00	Acclimating	A	27.776
2019-06-12	08:30:00	Acclimating	A	28.072
2019-06-12	08:30:00	Acclimating	A	27.875
2019-06-12	08:30:00	Acclimating	A	27.949
2019-06-12	09:00:00	Acclimating	A	28.32
2019-06-12	09:00:00	Acclimating	A	27.998
2019-06-12	09:00:00	Acclimating	A	28.221
2019-06-12	09:30:00	Acclimating	A	28.568
2019-06-12	09:30:00	Acclimating	A	28.147
2019-06-12	09:30:00	Acclimating	A	28.493
2019-06-12	10:00:00	Acclimating	A	28.841
2019-06-12	10:00:00	Acclimating	A	28.345
2019-06-12	10:00:00	Acclimating	A	28.766
2019-06-12	10:30:00	Acclimating	A	29.015
2019-06-12	10:30:00	Acclimating	A	28.419
2019-06-12	10:30:00	Acclimating	A	29.04
2019-06-12	11:00:00	Acclimating	A	29.265
2019-06-12	11:00:00	Acclimating	A	28.617
2019-06-12	11:00:00	Acclimating	A	29.315
2019-06-12	11:30:00	Acclimating	A	29.464
2019-06-12	11:30:00	Acclimating	A	28.717
2019-06-12	11:30:00	Acclimating	A	29.565
2019-06-12	12:00:00	Acclimating	A	29.64
2019-06-12	12:00:00	Acclimating	A	28.742
2019-06-12	12:00:00	Acclimating	A	29.865
2019-06-12	12:30:00	Acclimating	A	29.215
2019-06-12	12:30:00	Acclimating	A	28.617
2019-06-12	12:30:00	Acclimating	A	29.439
2019-06-12	13:00:00	Acclimating	A	28.916
2019-06-12	13:00:00	Acclimating	A	28.419
2019-06-12	13:00:00	Acclimating	A	29.115
2019-06-12	13:30:00	Acclimating	A	28.667
2019-06-12	13:30:00	Acclimating	A	28.394
2019-06-12	13:30:00	Acclimating	A	28.866
2019-06-12	14:00:00	Acclimating	A	28.593
2019-06-12	14:00:00	Acclimating	A	28.245
2019-06-12	14:00:00	Acclimating	A	28.766
2019-06-12	14:30:00	Acclimating	A	28.468
2019-06-12	14:30:00	Acclimating	A	28.196
2019-06-12	14:30:00	Acclimating	A	28.617
2019-06-12	15:00:00	Acclimating	A	28.518
2019-06-12	15:00:00	Acclimating	A	28.345
2019-06-12	15:00:00	Acclimating	A	28.667
2019-06-12	15:30:00	Acclimating	A	28.667
2019-06-12	15:30:00	Acclimating	A	28.369
2019-06-12	15:30:00	Acclimating	A	29.015
2019-06-12	16:00:00	Acclimating	A	28.518
2019-06-12	16:00:00	Acclimating	A	28.295
2019-06-12	16:00:00	Acclimating	A	28.965
2019-06-12	16:30:00	Acclimating	A	28.419
2019-06-12	16:30:00	Acclimating	A	28.196
2019-06-12	16:30:00	Acclimating	A	28.916
2019-06-12	17:00:00	Acclimating	A	28.369
2019-06-12	17:00:00	Acclimating	A	28.072
2019-06-12	17:00:00	Acclimating	A	28.717
2019-06-12	17:30:00	Acclimating	A	28.171
2019-06-12	17:30:00	Acclimating	A	27.998
2019-06-12	17:30:00	Acclimating	A	28.345
2019-06-12	18:00:00	Acclimating	A	27.974
2019-06-12	18:00:00	Acclimating	A	27.949
2019-06-12	18:00:00	Acclimating	A	28.122
2019-06-12	18:30:00	Acclimating	A	27.825
2019-06-12	18:30:00	Acclimating	A	27.899
2019-06-12	18:30:00	Acclimating	A	27.949
2019-06-12	19:00:00	Acclimating	A	27.702
2019-06-12	19:00:00	Acclimating	A	27.875
2019-06-12	19:00:00	Acclimating	A	27.825
2019-06-12	19:30:00	Acclimating	A	27.628
2019-06-12	19:30:00	Acclimating	A	27.875
2019-06-12	19:30:00	Acclimating	A	27.751
2019-06-12	20:00:00	Acclimating	A	27.604
2019-06-12	20:00:00	Acclimating	A	27.85
2019-06-12	20:00:00	Acclimating	A	27.677
2019-06-12	20:30:00	Acclimating	A	27.554
2019-06-12	20:30:00	Acclimating	A	27.825
2019-06-12	20:30:00	Acclimating	A	27.653
2019-06-12	21:00:00	Acclimating	A	27.53
2019-06-12	21:00:00	Acclimating	A	27.801
2019-06-12	21:00:00	Acclimating	A	27.628
2019-06-12	21:30:00	Acclimating	A	27.505
2019-06-12	21:30:00	Acclimating	A	27.776
2019-06-12	21:30:00	Acclimating	A	27.579
2019-06-12	22:00:00	Acclimating	A	27.505
2019-06-12	22:00:00	Acclimating	A	27.776
2019-06-12	22:00:00	Acclimating	A	27.554
2019-06-12	22:30:00	Acclimating	A	27.53
2019-06-12	22:30:00	Acclimating	A	27.801
2019-06-12	22:30:00	Acclimating	A	27.554
2019-06-12	23:00:00	Acclimating	A	27.554
2019-06-12	23:00:00	Acclimating	A	27.825
2019-06-12	23:00:00	Acclimating	A	27.579
2019-06-12	23:30:00	Acclimating	A	27.579
2019-06-12	23:30:00	Acclimating	A	27.825
2019-06-12	23:30:00	Acclimating	A	27.579
2019-06-13	00:00:00	Acclimating	A	27.579
2019-06-13	00:00:00	Acclimating	A	27.801
2019-06-13	00:00:00	Acclimating	A	27.579
2019-06-13	00:30:00	Acclimating	A	27.554
2019-06-13	00:30:00	Acclimating	A	27.801
2019-06-13	00:30:00	Acclimating	A	27.554
2019-06-13	01:00:00	Acclimating	A	27.554
2019-06-13	01:00:00	Acclimating	A	27.825
2019-06-13	01:00:00	Acclimating	A	27.554
2019-06-13	01:30:00	Acclimating	A	27.604
2019-06-13	01:30:00	Acclimating	A	27.875
2019-06-13	01:30:00	Acclimating	A	27.604
2019-06-13	02:00:00	Acclimating	A	27.653
2019-06-13	02:00:00	Acclimating	A	27.899
2019-06-13	02:00:00	Acclimating	A	27.653
2019-06-13	02:30:00	Acclimating	A	27.653
2019-06-13	02:30:00	Acclimating	A	27.899
2019-06-13	02:30:00	Acclimating	A	27.653
2019-06-13	03:00:00	Acclimating	A	27.604
2019-06-13	03:00:00	Acclimating	A	27.85
2019-06-13	03:00:00	Acclimating	A	27.628
2019-06-13	03:30:00	Acclimating	A	27.554
2019-06-13	03:30:00	Acclimating	A	27.801
2019-06-13	03:30:00	Acclimating	A	27.579
2019-06-13	04:00:00	Acclimating	A	27.53
2019-06-13	04:00:00	Acclimating	A	27.801
2019-06-13	04:00:00	Acclimating	A	27.554
2019-06-13	04:30:00	Acclimating	A	27.579
2019-06-13	04:30:00	Acclimating	A	27.801
2019-06-13	04:30:00	Acclimating	A	27.579
2019-06-13	05:00:00	Acclimating	A	27.554
2019-06-13	05:00:00	Acclimating	A	27.776
2019-06-13	05:00:00	Acclimating	A	27.554
2019-06-13	05:30:00	Acclimating	A	27.53
2019-06-13	05:30:00	Acclimating	A	27.776
2019-06-13	05:30:00	Acclimating	A	27.554
2019-06-13	06:00:00	Acclimating	A	27.505
2019-06-13	06:00:00	Acclimating	A	27.727
2019-06-13	06:00:00	Acclimating	A	27.53
2019-06-13	06:30:00	Acclimating	A	27.53
2019-06-13	06:30:00	Acclimating	A	27.751
2019-06-13	06:30:00	Acclimating	A	27.53
2019-06-13	07:00:00	Acclimating	A	27.604
2019-06-13	07:00:00	Acclimating	A	27.751
2019-06-13	07:00:00	Acclimating	A	27.604
2019-06-13	07:30:00	Acclimating	A	27.677
2019-06-13	07:30:00	Acclimating	A	27.751
2019-06-13	07:30:00	Acclimating	A	27.677
2019-06-13	08:00:00	Acclimating	A	27.924
2019-06-13	08:00:00	Acclimating	A	27.801
2019-06-13	08:00:00	Acclimating	A	27.85
2019-06-13	08:30:00	Acclimating	A	28.122
2019-06-13	08:30:00	Acclimating	A	27.875
2019-06-13	08:30:00	Acclimating	A	28.023
2019-06-13	09:00:00	Acclimating	A	28.345
2019-06-13	09:00:00	Acclimating	A	27.998
2019-06-13	09:00:00	Acclimating	A	28.245
2019-06-13	09:30:00	Acclimating	A	28.543
2019-06-13	09:30:00	Acclimating	A	28.122
2019-06-13	09:30:00	Acclimating	A	28.468
2019-06-13	10:00:00	Acclimating	A	28.791
2019-06-13	10:00:00	Acclimating	A	28.27
2019-06-13	10:00:00	Acclimating	A	28.742
2019-06-13	10:30:00	Acclimating	A	28.99
2019-06-13	10:30:00	Acclimating	A	28.345
2019-06-13	10:30:00	Acclimating	A	28.965
2019-06-13	11:00:00	Acclimating	A	29.14
2019-06-13	11:00:00	Acclimating	A	28.369
2019-06-13	11:00:00	Acclimating	A	29.165
2019-06-13	11:30:00	Acclimating	A	29.065
2019-06-13	11:30:00	Acclimating	A	28.345
2019-06-13	11:30:00	Acclimating	A	28.941
2019-06-13	12:00:00	Acclimating	A	29.315
2019-06-13	12:00:00	Acclimating	A	28.419
2019-06-13	12:00:00	Acclimating	A	28.841
2019-06-13	12:30:00	Acclimating	A	29.165
2019-06-13	12:30:00	Acclimating	A	28.345
2019-06-13	12:30:00	Acclimating	A	28.692
2019-06-13	13:00:00	Acclimating	A	29.065
2019-06-13	13:00:00	Acclimating	A	28.345
2019-06-13	13:00:00	Acclimating	A	28.617
2019-06-13	13:30:00	Acclimating	A	29.19
2019-06-13	13:30:00	Acclimating	A	28.468
2019-06-13	13:30:00	Acclimating	A	28.667
2019-06-13	14:00:00	Acclimating	A	29.265
2019-06-13	14:00:00	Acclimating	A	28.518
2019-06-13	14:00:00	Acclimating	A	28.667
2019-06-13	14:30:00	Acclimating	A	29.389
2019-06-13	14:30:00	Acclimating	A	28.593
2019-06-13	14:30:00	Acclimating	A	28.717
2019-06-13	15:00:00	Acclimating	A	29.29
2019-06-13	15:00:00	Acclimating	A	28.518
2019-06-13	15:00:00	Acclimating	A	28.766
2019-06-13	15:30:00	Acclimating	A	28.99
2019-06-13	15:30:00	Acclimating	A	28.444
2019-06-13	15:30:00	Acclimating	A	28.717
2019-06-13	16:00:00	Acclimating	A	28.617
2019-06-13	16:00:00	Acclimating	A	28.394
2019-06-13	16:00:00	Acclimating	A	28.667
2019-06-13	16:30:00	Acclimating	A	28.617
2019-06-13	16:30:00	Acclimating	A	28.32
2019-06-13	16:30:00	Acclimating	A	28.617
2019-06-13	17:00:00	Acclimating	A	28.369
2019-06-13	17:00:00	Acclimating	A	28.221
2019-06-13	17:00:00	Acclimating	A	28.493
2019-06-13	17:30:00	Acclimating	A	28.171
2019-06-13	17:30:00	Acclimating	A	28.171
2019-06-13	17:30:00	Acclimating	A	28.369
2019-06-13	18:00:00	Acclimating	A	28.023
2019-06-13	18:00:00	Acclimating	A	28.122
2019-06-13	18:00:00	Acclimating	A	28.27
2019-06-13	18:30:00	Acclimating	A	27.949
2019-06-13	18:30:00	Acclimating	A	28.122
2019-06-13	18:30:00	Acclimating	A	28.221
2019-06-13	19:00:00	Acclimating	A	27.924
2019-06-13	19:00:00	Acclimating	A	28.122
2019-06-13	19:00:00	Acclimating	A	28.171
2019-06-13	19:30:00	Acclimating	A	27.875
2019-06-13	19:30:00	Acclimating	A	28.072
2019-06-13	19:30:00	Acclimating	A	28.122
2019-06-13	20:00:00	Acclimating	A	27.825
2019-06-13	20:00:00	Acclimating	A	28.048
2019-06-13	20:00:00	Acclimating	A	28.072
2019-06-13	20:30:00	Acclimating	A	27.751
2019-06-13	20:30:00	Acclimating	A	27.974
2019-06-13	20:30:00	Acclimating	A	27.998
2019-06-13	21:00:00	Acclimating	A	27.727
2019-06-13	21:00:00	Acclimating	A	27.949
2019-06-13	21:00:00	Acclimating	A	27.949
2019-06-13	21:30:00	Acclimating	A	27.677
2019-06-13	21:30:00	Acclimating	A	27.924
2019-06-13	21:30:00	Acclimating	A	27.899
2019-06-13	22:00:00	Acclimating	A	27.653
2019-06-13	22:00:00	Acclimating	A	27.899
2019-06-13	22:00:00	Acclimating	A	27.875
2019-06-13	22:30:00	Acclimating	A	27.628
2019-06-13	22:30:00	Acclimating	A	27.875
2019-06-13	22:30:00	Acclimating	A	27.825
2019-06-13	23:00:00	Acclimating	A	27.628
2019-06-13	23:00:00	Acclimating	A	27.875
2019-06-13	23:00:00	Acclimating	A	27.825
2019-06-13	23:30:00	Acclimating	A	27.604
2019-06-13	23:30:00	Acclimating	A	27.85
2019-06-13	23:30:00	Acclimating	A	27.825
2019-06-14	00:00:00	Acclimating	A	27.579
2019-06-14	00:00:00	Acclimating	A	27.825
2019-06-14	00:00:00	Acclimating	A	27.776
2019-06-14	00:30:00	Acclimating	A	27.53
2019-06-14	00:30:00	Acclimating	A	27.776
2019-06-14	00:30:00	Acclimating	A	27.751
2019-06-14	01:00:00	Acclimating	A	27.481
2019-06-14	01:00:00	Acclimating	A	27.751
2019-06-14	01:00:00	Acclimating	A	27.702
2019-06-14	01:30:00	Acclimating	A	27.431
2019-06-14	01:30:00	Acclimating	A	27.702
2019-06-14	01:30:00	Acclimating	A	27.653
2019-06-14	02:00:00	Acclimating	A	27.407
2019-06-14	02:00:00	Acclimating	A	27.677
2019-06-14	02:00:00	Acclimating	A	27.628
2019-06-14	02:30:00	Acclimating	A	27.382
2019-06-14	02:30:00	Acclimating	A	27.677
2019-06-14	02:30:00	Acclimating	A	27.628
2019-06-14	03:00:00	Acclimating	A	27.407
2019-06-14	03:00:00	Acclimating	A	27.677
2019-06-14	03:00:00	Acclimating	A	27.604
2019-06-14	03:30:00	Acclimating	A	27.431
2019-06-14	03:30:00	Acclimating	A	27.677
2019-06-14	03:30:00	Acclimating	A	27.628
2019-06-14	04:00:00	Acclimating	A	27.431
2019-06-14	04:00:00	Acclimating	A	27.677
2019-06-14	04:00:00	Acclimating	A	27.628
2019-06-14	04:30:00	Acclimating	A	27.431
2019-06-14	04:30:00	Acclimating	A	27.677
2019-06-14	04:30:00	Acclimating	A	27.628
2019-06-14	05:00:00	Acclimating	A	27.431
2019-06-14	05:00:00	Acclimating	A	27.653
2019-06-14	05:00:00	Acclimating	A	27.604
2019-06-14	05:30:00	Acclimating	A	27.407
2019-06-14	05:30:00	Acclimating	A	27.628
2019-06-14	05:30:00	Acclimating	A	27.579
2019-06-14	06:00:00	Acclimating	A	27.382
2019-06-14	06:00:00	Acclimating	A	27.579
2019-06-14	06:00:00	Acclimating	A	27.53
2019-06-14	06:30:00	Acclimating	A	27.431
2019-06-14	06:30:00	Acclimating	A	27.579
2019-06-14	06:30:00	Acclimating	A	27.53
2019-06-14	07:00:00	Acclimating	A	27.554
2019-06-14	07:00:00	Acclimating	A	27.628
2019-06-14	07:00:00	Acclimating	A	27.604
2019-06-14	07:30:00	Acclimating	A	27.727
2019-06-14	07:30:00	Acclimating	A	27.677
2019-06-14	07:30:00	Acclimating	A	27.628
2019-06-14	08:00:00	Acclimating	A	27.899
2019-06-14	08:00:00	Acclimating	A	27.751
2019-06-14	08:00:00	Acclimating	A	27.702
2019-06-14	08:30:00	Acclimating	A	27.924
2019-06-14	08:30:00	Acclimating	A	27.776
2019-06-14	08:30:00	Acclimating	A	27.751
2019-06-14	09:00:00	Acclimating	A	28.295
2019-06-14	09:00:00	Acclimating	A	27.924
2019-06-14	09:00:00	Acclimating	A	27.875
2019-06-14	09:30:00	Acclimating	A	28.543
2019-06-14	09:30:00	Acclimating	A	28.221
2019-06-14	09:30:00	Acclimating	A	27.998
2019-06-14	10:00:00	Acclimating	A	28.791
2019-06-14	10:00:00	Acclimating	A	28.543
2019-06-14	10:00:00	Acclimating	A	28.097
2019-06-14	10:30:00	Acclimating	A	29.015
2019-06-14	10:30:00	Acclimating	A	28.766
2019-06-14	10:30:00	Acclimating	A	28.196
2019-06-14	11:00:00	Acclimating	A	29.24
2019-06-14	11:00:00	Acclimating	A	29.04
2019-06-14	11:00:00	Acclimating	A	28.667
2019-06-14	11:30:00	Acclimating	A	29.414
2019-06-14	11:30:00	Acclimating	A	29.365
2019-06-14	11:30:00	Acclimating	A	29.165
2019-06-14	12:00:00	Acclimating	A	29.615
2019-06-14	12:00:00	Acclimating	A	29.49
2019-06-14	12:00:00	Acclimating	A	29.065
2019-06-14	12:30:00	Acclimating	A	29.715
2019-06-14	12:30:00	Acclimating	A	29.59
2019-06-14	12:30:00	Acclimating	A	28.841
2019-06-14	13:00:00	Acclimating	A	29.69
2019-06-14	13:00:00	Acclimating	A	28.965
2019-06-14	13:00:00	Acclimating	A	28.692
2019-06-14	13:30:00	Acclimating	A	29.315
2019-06-14	13:30:00	Acclimating	A	28.617
2019-06-14	13:30:00	Acclimating	A	28.518
2019-06-14	14:00:00	Acclimating	A	29.165
2019-06-14	14:00:00	Acclimating	A	28.419
2019-06-14	14:00:00	Acclimating	A	28.369
2019-06-14	14:30:00	Acclimating	A	28.642
2019-06-14	14:30:00	Acclimating	A	28.345
2019-06-14	14:30:00	Acclimating	A	28.27
2019-06-14	15:00:00	Acclimating	A	28.617
2019-06-14	15:00:00	Acclimating	A	28.493
2019-06-14	15:00:00	Acclimating	A	28.419
2019-06-14	15:30:00	Acclimating	A	28.568
2019-06-14	15:30:00	Acclimating	A	28.32
2019-06-14	15:30:00	Acclimating	A	28.345
2019-06-14	16:00:00	Acclimating	A	28.32
2019-06-14	16:00:00	Acclimating	A	28.221
2019-06-14	16:00:00	Acclimating	A	28.345
2019-06-14	16:30:00	Acclimating	A	28.345
2019-06-14	16:30:00	Acclimating	A	28.345
2019-06-14	16:30:00	Acclimating	A	28.394
2019-06-14	17:00:00	Acclimating	A	28.245
2019-06-14	17:00:00	Acclimating	A	28.196
2019-06-14	17:00:00	Acclimating	A	28.369
2019-06-14	17:30:00	Acclimating	A	28.122
2019-06-14	17:30:00	Acclimating	A	28.048
2019-06-14	17:30:00	Acclimating	A	28.196
2019-06-14	18:00:00	Acclimating	A	28.048
2019-06-14	18:00:00	Acclimating	A	27.998
2019-06-14	18:00:00	Acclimating	A	28.097
2019-06-14	18:30:00	Acclimating	A	28.023
2019-06-14	18:30:00	Acclimating	A	27.949
2019-06-14	18:30:00	Acclimating	A	28.023
2019-06-14	19:00:00	Acclimating	A	27.974
2019-06-14	19:00:00	Acclimating	A	27.924
2019-06-14	19:00:00	Acclimating	A	27.949
2019-06-14	19:30:00	Acclimating	A	27.974
2019-06-14	19:30:00	Acclimating	A	27.924
2019-06-14	19:30:00	Acclimating	A	27.949
2019-06-14	20:00:00	Acclimating	A	27.974
2019-06-14	20:00:00	Acclimating	A	27.924
2019-06-14	20:00:00	Acclimating	A	27.949
2019-06-14	20:30:00	Acclimating	A	27.949
2019-06-14	20:30:00	Acclimating	A	27.899
2019-06-14	20:30:00	Acclimating	A	27.924
2019-06-14	21:00:00	Acclimating	A	27.924
2019-06-14	21:00:00	Acclimating	A	27.875
2019-06-14	21:00:00	Acclimating	A	27.875
2019-06-14	21:30:00	Acclimating	A	27.899
2019-06-14	21:30:00	Acclimating	A	27.85
2019-06-14	21:30:00	Acclimating	A	27.85
2019-06-14	22:00:00	Acclimating	A	27.875
2019-06-14	22:00:00	Acclimating	A	27.825
2019-06-14	22:00:00	Acclimating	A	27.825
2019-06-14	22:30:00	Acclimating	A	27.875
2019-06-14	22:30:00	Acclimating	A	27.825
2019-06-14	22:30:00	Acclimating	A	27.801
2019-06-14	23:00:00	Acclimating	A	27.825
2019-06-14	23:00:00	Acclimating	A	27.776
2019-06-14	23:00:00	Acclimating	A	27.776
2019-06-14	23:30:00	Acclimating	A	27.801
2019-06-14	23:30:00	Acclimating	A	27.751
2019-06-14	23:30:00	Acclimating	A	27.751
2019-06-15	00:00:00	Acclimating	A	27.776
2019-06-15	00:00:00	Acclimating	A	27.727
2019-06-15	00:00:00	Acclimating	A	27.702
2019-06-15	00:30:00	Acclimating	A	27.776
2019-06-15	00:30:00	Acclimating	A	27.702
2019-06-15	00:30:00	Acclimating	A	27.677
2019-06-15	01:00:00	Acclimating	A	27.727
2019-06-15	01:00:00	Acclimating	A	27.677
2019-06-15	01:00:00	Acclimating	A	27.628
2019-06-15	01:30:00	Acclimating	A	27.702
2019-06-15	01:30:00	Acclimating	A	27.653
2019-06-15	01:30:00	Acclimating	A	27.604
2019-06-15	02:00:00	Acclimating	A	27.702
2019-06-15	02:00:00	Acclimating	A	27.653
2019-06-15	02:00:00	Acclimating	A	27.628
2019-06-15	02:30:00	Acclimating	A	27.702
2019-06-15	02:30:00	Acclimating	A	27.653
2019-06-15	02:30:00	Acclimating	A	27.628
2019-06-15	03:00:00	Acclimating	A	27.653
2019-06-15	03:00:00	Acclimating	A	27.628
2019-06-15	03:00:00	Acclimating	A	27.604
2019-06-15	03:30:00	Acclimating	A	27.628
2019-06-15	03:30:00	Acclimating	A	27.579
2019-06-15	03:30:00	Acclimating	A	27.579
2019-06-15	04:00:00	Acclimating	A	27.604
2019-06-15	04:00:00	Acclimating	A	27.554
2019-06-15	04:00:00	Acclimating	A	27.554
2019-06-15	04:30:00	Acclimating	A	27.579
2019-06-15	04:30:00	Acclimating	A	27.53
2019-06-15	04:30:00	Acclimating	A	27.505
2019-06-15	05:00:00	Acclimating	A	27.554
2019-06-15	05:00:00	Acclimating	A	27.481
2019-06-15	05:00:00	Acclimating	A	27.481
2019-06-15	05:30:00	Acclimating	A	27.53
2019-06-15	05:30:00	Acclimating	A	27.481
2019-06-15	05:30:00	Acclimating	A	27.481
2019-06-15	06:00:00	Acclimating	A	27.505
2019-06-15	06:00:00	Acclimating	A	27.481
2019-06-15	06:00:00	Acclimating	A	27.481
2019-06-15	06:30:00	Acclimating	A	27.53
2019-06-15	06:30:00	Acclimating	A	27.505
2019-06-15	06:30:00	Acclimating	A	27.481
2019-06-15	07:00:00	Acclimating	A	27.554
2019-06-15	07:00:00	Acclimating	A	27.53
2019-06-15	07:00:00	Acclimating	A	27.53
2019-06-15	07:30:00	Acclimating	A	27.628
2019-06-15	07:30:00	Acclimating	A	27.628
2019-06-15	07:30:00	Acclimating	A	27.579
2019-06-15	08:00:00	Acclimating	A	27.727
2019-06-15	08:00:00	Acclimating	A	27.751
2019-06-15	08:00:00	Acclimating	A	27.677
2019-06-15	08:30:00	Acclimating	A	27.776
2019-06-15	08:30:00	Acclimating	A	27.751
2019-06-15	08:30:00	Acclimating	A	27.776
2019-06-15	09:00:00	Acclimating	A	27.776
2019-06-15	09:00:00	Acclimating	A	27.825
2019-06-15	09:00:00	Acclimating	A	27.751
2019-06-15	09:30:00	Acclimating	A	27.924
2019-06-15	09:30:00	Acclimating	A	27.998
2019-06-15	09:30:00	Acclimating	A	27.924
2019-06-15	10:00:00	Acclimating	A	28.048
2019-06-15	10:00:00	Acclimating	A	28.196
2019-06-15	10:00:00	Acclimating	A	28.072
2019-06-15	10:30:00	Acclimating	A	28.196
2019-06-15	10:30:00	Acclimating	A	28.369
2019-06-15	10:30:00	Acclimating	A	28.27
2019-06-15	11:00:00	Acclimating	A	28.345
2019-06-15	11:00:00	Acclimating	A	28.543
2019-06-15	11:00:00	Acclimating	A	28.468
2019-06-15	11:30:00	Acclimating	A	28.444
2019-06-15	11:30:00	Acclimating	A	28.543
2019-06-15	11:30:00	Acclimating	A	28.593
2019-06-15	12:00:00	Acclimating	A	28.394
2019-06-15	12:00:00	Acclimating	A	28.369
2019-06-15	12:00:00	Acclimating	A	28.518
2019-06-15	12:30:00	Acclimating	A	28.221
2019-06-15	12:30:00	Acclimating	A	28.221
2019-06-15	12:30:00	Acclimating	A	28.345
2019-06-15	13:00:00	Acclimating	A	28.147
2019-06-15	13:00:00	Acclimating	A	28.122
2019-06-15	13:00:00	Acclimating	A	28.27
2019-06-15	13:30:00	Acclimating	A	28.171
2019-06-15	13:30:00	Acclimating	A	28.32
2019-06-15	13:30:00	Acclimating	A	28.27
2019-06-15	14:00:00	Acclimating	A	28.196
2019-06-15	14:00:00	Acclimating	A	28.245
2019-06-15	14:00:00	Acclimating	A	28.419
2019-06-15	14:30:00	Acclimating	A	28.221
2019-06-15	14:30:00	Acclimating	A	28.32
2019-06-15	14:30:00	Acclimating	A	28.444
2019-06-15	15:00:00	Acclimating	A	28.32
2019-06-15	15:00:00	Acclimating	A	28.444
2019-06-15	15:00:00	Acclimating	A	28.593
2019-06-15	15:30:00	Acclimating	A	28.27
2019-06-15	15:30:00	Acclimating	A	28.419
2019-06-15	15:30:00	Acclimating	A	28.593
2019-06-15	16:00:00	Acclimating	A	28.245
2019-06-15	16:00:00	Acclimating	A	28.27
2019-06-15	16:00:00	Acclimating	A	28.468
2019-06-15	16:30:00	Acclimating	A	28.221
2019-06-15	16:30:00	Acclimating	A	28.245
2019-06-15	16:30:00	Acclimating	A	28.369
2019-06-15	17:00:00	Acclimating	A	28.221
2019-06-15	17:00:00	Acclimating	A	28.147
2019-06-15	17:00:00	Acclimating	A	28.27
2019-06-15	17:30:00	Acclimating	A	28.147
2019-06-15	17:30:00	Acclimating	A	28.072
2019-06-15	17:30:00	Acclimating	A	28.147
2019-06-15	18:00:00	Acclimating	A	28.072
2019-06-15	18:00:00	Acclimating	A	27.998
2019-06-15	18:00:00	Acclimating	A	28.023
2019-06-15	18:30:00	Acclimating	A	28.023
2019-06-15	18:30:00	Acclimating	A	27.924
2019-06-15	18:30:00	Acclimating	A	27.924
2019-06-15	19:00:00	Acclimating	A	27.949
2019-06-15	19:00:00	Acclimating	A	27.875
2019-06-15	19:00:00	Acclimating	A	27.875
2019-06-15	19:30:00	Acclimating	A	27.875
2019-06-15	19:30:00	Acclimating	A	27.776
2019-06-15	19:30:00	Acclimating	A	27.801
2019-06-15	20:00:00	Acclimating	A	27.776
2019-06-15	20:00:00	Acclimating	A	27.702
2019-06-15	20:00:00	Acclimating	A	27.727
2019-06-15	20:30:00	Acclimating	A	27.727
2019-06-15	20:30:00	Acclimating	A	27.653
2019-06-15	20:30:00	Acclimating	A	27.653
2019-06-15	21:00:00	Acclimating	A	27.677
2019-06-15	21:00:00	Acclimating	A	27.604
2019-06-15	21:00:00	Acclimating	A	27.628
2019-06-15	21:30:00	Acclimating	A	27.628
2019-06-15	21:30:00	Acclimating	A	27.579
2019-06-15	21:30:00	Acclimating	A	27.554
2019-06-15	22:00:00	Acclimating	A	27.653
2019-06-15	22:00:00	Acclimating	A	27.628
2019-06-15	22:00:00	Acclimating	A	27.579
2019-06-15	22:30:00	Acclimating	A	27.653
2019-06-15	22:30:00	Acclimating	A	27.628
2019-06-15	22:30:00	Acclimating	A	27.579
2019-06-15	23:00:00	Acclimating	A	27.653
2019-06-15	23:00:00	Acclimating	A	27.579
2019-06-15	23:00:00	Acclimating	A	27.554
2019-06-15	23:30:00	Acclimating	A	27.604
2019-06-15	23:30:00	Acclimating	A	27.554
2019-06-15	23:30:00	Acclimating	A	27.53
2019-06-16	00:00:00	Acclimating	A	27.579
2019-06-16	00:00:00	Acclimating	A	27.554
2019-06-16	00:00:00	Acclimating	A	27.505
2019-06-16	00:30:00	Acclimating	A	27.579
2019-06-16	00:30:00	Acclimating	A	27.554
2019-06-16	00:30:00	Acclimating	A	27.481
2019-06-16	01:00:00	Acclimating	A	27.579
2019-06-16	01:00:00	Acclimating	A	27.53
2019-06-16	01:00:00	Acclimating	A	27.481
2019-06-16	01:30:00	Acclimating	A	27.579
2019-06-16	01:30:00	Acclimating	A	27.53
2019-06-16	01:30:00	Acclimating	A	27.456
2019-06-16	02:00:00	Acclimating	A	27.579
2019-06-16	02:00:00	Acclimating	A	27.53
2019-06-16	02:00:00	Acclimating	A	27.431
2019-06-16	02:30:00	Acclimating	A	27.579
2019-06-16	02:30:00	Acclimating	A	27.505
2019-06-16	02:30:00	Acclimating	A	27.431
2019-06-16	03:00:00	Acclimating	A	27.554
2019-06-16	03:00:00	Acclimating	A	27.481
2019-06-16	03:00:00	Acclimating	A	27.431
2019-06-16	03:30:00	Acclimating	A	27.505
2019-06-16	03:30:00	Acclimating	A	27.456
2019-06-16	03:30:00	Acclimating	A	27.407
2019-06-16	04:00:00	Acclimating	A	27.481
2019-06-16	04:00:00	Acclimating	A	27.407
2019-06-16	04:00:00	Acclimating	A	27.382
2019-06-16	04:30:00	Acclimating	A	27.407
2019-06-16	04:30:00	Acclimating	A	27.308
2019-06-16	04:30:00	Acclimating	A	27.284
2019-06-16	05:00:00	Acclimating	A	27.358
2019-06-16	05:00:00	Acclimating	A	27.284
2019-06-16	05:00:00	Acclimating	A	27.235
2019-06-16	05:30:00	Acclimating	A	27.358
2019-06-16	05:30:00	Acclimating	A	27.308
2019-06-16	05:30:00	Acclimating	A	27.235
2019-06-16	06:00:00	Acclimating	A	27.333
2019-06-16	06:00:00	Acclimating	A	27.284
2019-06-16	06:00:00	Acclimating	A	27.21
2019-06-16	06:30:00	Acclimating	A	27.333
2019-06-16	06:30:00	Acclimating	A	27.284
2019-06-16	06:30:00	Acclimating	A	27.21
2019-06-16	07:00:00	Acclimating	A	27.382
2019-06-16	07:00:00	Acclimating	A	27.358
2019-06-16	07:00:00	Acclimating	A	27.259
2019-06-16	07:30:00	Acclimating	A	27.407
2019-06-16	07:30:00	Acclimating	A	27.382
2019-06-16	07:30:00	Acclimating	A	27.284
2019-06-16	08:00:00	Acclimating	A	27.431
2019-06-16	08:00:00	Acclimating	A	27.407
2019-06-16	08:00:00	Acclimating	A	27.333
2019-06-16	08:30:00	Acclimating	A	27.481
2019-06-16	08:30:00	Acclimating	A	27.481
2019-06-16	08:30:00	Acclimating	A	27.382
2019-06-16	09:00:00	Acclimating	A	27.579
2019-06-16	09:00:00	Acclimating	A	27.604
2019-06-16	09:00:00	Acclimating	A	27.53
2019-06-16	09:30:00	Acclimating	A	27.677
2019-06-16	09:30:00	Acclimating	A	27.702
2019-06-16	09:30:00	Acclimating	A	27.628
2019-06-16	10:00:00	Acclimating	A	27.776
2019-06-16	10:00:00	Acclimating	A	27.85
2019-06-16	10:00:00	Acclimating	A	27.801
2019-06-16	10:30:00	Acclimating	A	27.875
2019-06-16	10:30:00	Acclimating	A	27.949
2019-06-16	10:30:00	Acclimating	A	27.924
2019-06-16	11:00:00	Acclimating	A	27.974
2019-06-16	11:00:00	Acclimating	A	28.072
2019-06-16	11:00:00	Acclimating	A	28.048
2019-06-16	11:30:00	Acclimating	A	27.998
2019-06-16	11:30:00	Acclimating	A	28.023
2019-06-16	11:30:00	Acclimating	A	28.072
2019-06-16	12:00:00	Acclimating	A	27.899
2019-06-16	12:00:00	Acclimating	A	27.85
2019-06-16	12:00:00	Acclimating	A	27.974
2019-06-16	12:30:00	Acclimating	A	27.825
2019-06-16	12:30:00	Acclimating	A	27.801
2019-06-16	12:30:00	Acclimating	A	27.875
2019-06-16	13:00:00	Acclimating	A	27.825
2019-06-16	13:00:00	Acclimating	A	27.899
2019-06-16	13:00:00	Acclimating	A	27.924
2019-06-16	13:30:00	Acclimating	A	27.899
2019-06-16	13:30:00	Acclimating	A	27.974
2019-06-16	13:30:00	Acclimating	A	28.023
2019-06-16	14:00:00	Acclimating	A	27.924
2019-06-16	14:00:00	Acclimating	A	27.949
2019-06-16	14:00:00	Acclimating	A	28.048
2019-06-16	14:30:00	Acclimating	A	27.85
2019-06-16	14:30:00	Acclimating	A	27.85
2019-06-16	14:30:00	Acclimating	A	27.949
2019-06-16	15:00:00	Acclimating	A	27.776
2019-06-16	15:00:00	Acclimating	A	27.751
2019-06-16	15:00:00	Acclimating	A	27.825
2019-06-16	15:30:00	Acclimating	A	27.727
2019-06-16	15:30:00	Acclimating	A	27.677
2019-06-16	15:30:00	Acclimating	A	27.727
2019-06-16	16:00:00	Acclimating	A	27.677
2019-06-16	16:00:00	Acclimating	A	27.628
2019-06-16	16:00:00	Acclimating	A	27.628
2019-06-16	16:30:00	Acclimating	A	27.653
2019-06-16	16:30:00	Acclimating	A	27.604
2019-06-16	16:30:00	Acclimating	A	27.604
2019-06-16	17:00:00	Acclimating	A	27.604
2019-06-16	17:00:00	Acclimating	A	27.554
2019-06-16	17:00:00	Acclimating	A	27.554
2019-06-16	17:30:00	Acclimating	A	27.604
2019-06-16	17:30:00	Acclimating	A	27.554
2019-06-16	17:30:00	Acclimating	A	27.53
2019-06-16	18:00:00	Acclimating	A	27.579
2019-06-16	18:00:00	Acclimating	A	27.53
2019-06-16	18:00:00	Acclimating	A	27.505
2019-06-16	18:30:00	Acclimating	A	27.554
2019-06-16	18:30:00	Acclimating	A	27.505
2019-06-16	18:30:00	Acclimating	A	27.481
2019-06-16	19:00:00	Acclimating	A	27.53
2019-06-16	19:00:00	Acclimating	A	27.456
2019-06-16	19:00:00	Acclimating	A	27.431
2019-06-16	19:30:00	Acclimating	A	27.481
2019-06-16	19:30:00	Acclimating	A	27.431
2019-06-16	19:30:00	Acclimating	A	27.382
2019-06-16	20:00:00	Acclimating	A	27.456
2019-06-16	20:00:00	Acclimating	A	27.407
2019-06-16	20:00:00	Acclimating	A	27.358
2019-06-16	20:30:00	Acclimating	A	27.431
2019-06-16	20:30:00	Acclimating	A	27.358
2019-06-16	20:30:00	Acclimating	A	27.333
2019-06-16	21:00:00	Acclimating	A	27.407
2019-06-16	21:00:00	Acclimating	A	27.358
2019-06-16	21:00:00	Acclimating	A	27.308
2019-06-16	21:30:00	Acclimating	A	27.407
2019-06-16	21:30:00	Acclimating	A	27.358
2019-06-16	21:30:00	Acclimating	A	27.284
2019-06-16	22:00:00	Acclimating	A	27.407
2019-06-16	22:00:00	Acclimating	A	27.358
2019-06-16	22:00:00	Acclimating	A	27.308
2019-06-16	22:30:00	Acclimating	A	27.407
2019-06-16	22:30:00	Acclimating	A	27.358
2019-06-16	22:30:00	Acclimating	A	27.308
2019-06-16	23:00:00	Acclimating	A	27.407
2019-06-16	23:00:00	Acclimating	A	27.358
2019-06-16	23:00:00	Acclimating	A	27.308
2019-06-16	23:30:00	Acclimating	A	27.407
2019-06-16	23:30:00	Acclimating	A	27.358
2019-06-16	23:30:00	Acclimating	A	27.284
2019-06-17	00:00:00	Acclimating	A	27.382
2019-06-17	00:00:00	Acclimating	A	27.333
2019-06-17	00:00:00	Acclimating	A	27.284
2019-06-17	00:30:00	Acclimating	A	27.382
2019-06-17	00:30:00	Acclimating	A	27.333
2019-06-17	00:30:00	Acclimating	A	27.284
2019-06-17	01:00:00	Acclimating	A	27.382
2019-06-17	01:00:00	Acclimating	A	27.333
2019-06-17	01:00:00	Acclimating	A	27.259
2019-06-17	01:30:00	Acclimating	A	27.382
2019-06-17	01:30:00	Acclimating	A	27.333
2019-06-17	01:30:00	Acclimating	A	27.284
2019-06-17	02:00:00	Acclimating	A	27.382
2019-06-17	02:00:00	Acclimating	A	27.333
2019-06-17	02:00:00	Acclimating	A	27.259
2019-06-17	02:30:00	Acclimating	A	27.358
2019-06-17	02:30:00	Acclimating	A	27.308
2019-06-17	02:30:00	Acclimating	A	27.259
2019-06-17	03:00:00	Acclimating	A	27.382
2019-06-17	03:00:00	Acclimating	A	27.308
2019-06-17	03:00:00	Acclimating	A	27.284
2019-06-17	03:30:00	Acclimating	A	27.333
2019-06-17	03:30:00	Acclimating	A	27.284
2019-06-17	03:30:00	Acclimating	A	27.259
2019-06-17	04:00:00	Acclimating	A	27.333
2019-06-17	04:00:00	Acclimating	A	27.284
2019-06-17	04:00:00	Acclimating	A	27.259
2019-06-17	04:30:00	Acclimating	A	27.358
2019-06-17	04:30:00	Acclimating	A	27.284
2019-06-17	04:30:00	Acclimating	A	27.284
2019-06-17	05:00:00	Acclimating	A	27.333
2019-06-17	05:00:00	Acclimating	A	27.259
2019-06-17	05:00:00	Acclimating	A	27.259
2019-06-17	05:30:00	Acclimating	A	27.308
2019-06-17	05:30:00	Acclimating	A	27.259
2019-06-17	05:30:00	Acclimating	A	27.235
2019-06-17	06:00:00	Acclimating	A	27.308
2019-06-17	06:00:00	Acclimating	A	27.235
2019-06-17	06:00:00	Acclimating	A	27.21
2019-06-17	06:30:00	Acclimating	A	27.259
2019-06-17	06:30:00	Acclimating	A	27.186
2019-06-17	06:30:00	Acclimating	A	27.186
2019-06-17	07:00:00	Acclimating	A	27.235
2019-06-17	07:00:00	Acclimating	A	27.161
2019-06-17	07:00:00	Acclimating	A	27.161
2019-06-17	07:30:00	Acclimating	A	27.284
2019-06-17	07:30:00	Acclimating	A	27.259
2019-06-17	07:30:00	Acclimating	A	27.21
2019-06-17	08:00:00	Acclimating	A	27.407
2019-06-17	08:00:00	Acclimating	A	27.407
2019-06-17	08:00:00	Acclimating	A	27.333
2019-06-17	08:30:00	Acclimating	A	27.53
2019-06-17	08:30:00	Acclimating	A	27.604
2019-06-17	08:30:00	Acclimating	A	27.481
2019-06-17	09:00:00	Acclimating	A	27.677
2019-06-17	09:00:00	Acclimating	A	27.751
2019-06-17	09:00:00	Acclimating	A	27.628
2019-06-17	09:30:00	Acclimating	A	27.85
2019-06-17	09:30:00	Acclimating	A	27.875
2019-06-17	09:30:00	Acclimating	A	27.825
2019-06-17	10:00:00	Acclimating	A	27.924
2019-06-17	10:00:00	Acclimating	A	28.196
2019-06-17	10:00:00	Acclimating	A	27.974
2019-06-17	10:30:00	Acclimating	A	27.998
2019-06-17	10:30:00	Acclimating	A	28.369
2019-06-17	10:30:00	Acclimating	A	28.122
2019-06-17	11:00:00	Acclimating	A	28.072
2019-06-17	11:00:00	Acclimating	A	28.295
2019-06-17	11:00:00	Acclimating	A	28.171
2019-06-17	11:30:00	Acclimating	A	28.171
2019-06-17	11:30:00	Acclimating	A	28.345
2019-06-17	11:30:00	Acclimating	A	28.32
2019-06-17	12:00:00	Acclimating	A	28.295
2019-06-17	12:00:00	Acclimating	A	28.468
2019-06-17	12:00:00	Acclimating	A	28.468
2019-06-17	12:30:00	Acclimating	A	28.667
2019-06-17	12:30:00	Acclimating	A	28.593
2019-06-17	12:30:00	Acclimating	A	28.667
2019-06-17	13:00:00	Acclimating	A	28.841
2019-06-17	13:00:00	Acclimating	A	28.468
2019-06-17	13:00:00	Acclimating	A	28.667
2019-06-17	13:30:00	Acclimating	A	29.065
2019-06-17	13:30:00	Acclimating	A	28.543
2019-06-17	13:30:00	Acclimating	A	28.742
2019-06-17	14:00:00	Acclimating	A	28.816
2019-06-17	14:00:00	Acclimating	A	28.543
2019-06-17	14:00:00	Acclimating	A	28.816
2019-06-17	14:30:00	Acclimating	A	28.667
2019-06-17	14:30:00	Acclimating	A	28.593
2019-06-17	14:30:00	Acclimating	A	28.717
2019-06-17	15:00:00	Acclimating	A	28.742
2019-06-17	15:00:00	Acclimating	A	28.717
2019-06-17	15:00:00	Acclimating	A	28.866
2019-06-17	15:30:00	Acclimating	A	28.717
2019-06-17	15:30:00	Acclimating	A	28.692
2019-06-17	15:30:00	Acclimating	A	28.841
2019-06-17	16:00:00	Acclimating	A	28.742
2019-06-17	16:00:00	Acclimating	A	28.717
2019-06-17	16:00:00	Acclimating	A	28.941
2019-06-17	16:30:00	Acclimating	A	28.568
2019-06-17	16:30:00	Acclimating	A	28.493
2019-06-17	16:30:00	Acclimating	A	28.717
2019-06-17	17:00:00	Acclimating	A	28.419
2019-06-17	17:00:00	Acclimating	A	28.27
2019-06-17	17:00:00	Acclimating	A	28.493
2019-06-17	17:30:00	Acclimating	A	28.171
2019-06-17	17:30:00	Acclimating	A	28.072
2019-06-17	17:30:00	Acclimating	A	28.221
2019-06-17	18:00:00	Acclimating	A	28.023
2019-06-17	18:00:00	Acclimating	A	27.949
2019-06-17	18:00:00	Acclimating	A	27.974
2019-06-17	18:30:00	Acclimating	A	27.949
2019-06-17	18:30:00	Acclimating	A	27.875
2019-06-17	18:30:00	Acclimating	A	27.899
2019-06-17	19:00:00	Acclimating	A	27.899
2019-06-17	19:00:00	Acclimating	A	27.825
2019-06-17	19:00:00	Acclimating	A	27.85
2019-06-17	19:30:00	Acclimating	A	27.949
2019-06-17	19:30:00	Acclimating	A	27.924
2019-06-17	19:30:00	Acclimating	A	27.899
2019-06-17	20:00:00	Acclimating	A	28.023
2019-06-17	20:00:00	Acclimating	A	27.974
2019-06-17	20:00:00	Acclimating	A	27.949
2019-06-17	20:30:00	Acclimating	A	28.048
2019-06-17	20:30:00	Acclimating	A	27.998
2019-06-17	20:30:00	Acclimating	A	27.974
2019-06-17	21:00:00	Acclimating	A	28.048
2019-06-17	21:00:00	Acclimating	A	27.998
2019-06-17	21:00:00	Acclimating	A	27.974
2019-06-17	21:30:00	Acclimating	A	28.023
2019-06-17	21:30:00	Acclimating	A	27.949
2019-06-17	21:30:00	Acclimating	A	27.949
2019-06-17	22:00:00	Acclimating	A	27.998
2019-06-17	22:00:00	Acclimating	A	27.924
2019-06-17	22:00:00	Acclimating	A	27.924
2019-06-17	22:30:00	Acclimating	A	27.949
2019-06-17	22:30:00	Acclimating	A	27.85
2019-06-17	22:30:00	Acclimating	A	27.899
2019-06-17	23:00:00	Acclimating	A	27.899
2019-06-17	23:00:00	Acclimating	A	27.825
2019-06-17	23:00:00	Acclimating	A	27.85
2019-06-17	23:30:00	Acclimating	A	27.85
2019-06-17	23:30:00	Acclimating	A	27.776
2019-06-17	23:30:00	Acclimating	A	27.801
2019-06-18	00:00:00	Acclimating	A	27.801
2019-06-18	00:00:00	Acclimating	A	27.727
2019-06-18	00:00:00	Acclimating	A	27.751
2019-06-18	00:30:00	Acclimating	A	27.776
2019-06-18	00:30:00	Acclimating	A	27.702
2019-06-18	00:30:00	Acclimating	A	27.751
2019-06-18	01:00:00	Acclimating	A	27.776
2019-06-18	01:00:00	Acclimating	A	27.702
2019-06-18	01:00:00	Acclimating	A	27.727
2019-06-18	01:30:00	Acclimating	A	27.727
2019-06-18	01:30:00	Acclimating	A	27.653
2019-06-18	01:30:00	Acclimating	A	27.702
2019-06-18	02:00:00	Acclimating	A	27.677
2019-06-18	02:00:00	Acclimating	A	27.604
2019-06-18	02:00:00	Acclimating	A	27.653
2019-06-18	02:30:00	Acclimating	A	27.677
2019-06-18	02:30:00	Acclimating	A	27.579
2019-06-18	02:30:00	Acclimating	A	27.628
2019-06-18	03:00:00	Acclimating	A	27.628
2019-06-18	03:00:00	Acclimating	A	27.579
2019-06-18	03:00:00	Acclimating	A	27.604
2019-06-18	03:30:00	Acclimating	A	27.628
2019-06-18	03:30:00	Acclimating	A	27.554
2019-06-18	03:30:00	Acclimating	A	27.604
2019-06-18	04:00:00	Acclimating	A	27.604
2019-06-18	04:00:00	Acclimating	A	27.53
2019-06-18	04:00:00	Acclimating	A	27.579
2019-06-18	04:30:00	Acclimating	A	27.579
2019-06-18	04:30:00	Acclimating	A	27.505
2019-06-18	04:30:00	Acclimating	A	27.554
2019-06-18	05:00:00	Acclimating	A	27.554
2019-06-18	05:00:00	Acclimating	A	27.481
2019-06-18	05:00:00	Acclimating	A	27.53
2019-06-18	05:30:00	Acclimating	A	27.53
2019-06-18	05:30:00	Acclimating	A	27.456
2019-06-18	05:30:00	Acclimating	A	27.505
2019-06-18	06:00:00	Acclimating	A	27.505
2019-06-18	06:00:00	Acclimating	A	27.431
2019-06-18	06:00:00	Acclimating	A	27.456
2019-06-18	06:30:00	Acclimating	A	27.53
2019-06-18	06:30:00	Acclimating	A	27.456
2019-06-18	06:30:00	Acclimating	A	27.481
2019-06-18	07:00:00	Acclimating	A	27.554
2019-06-18	07:00:00	Acclimating	A	27.505
2019-06-18	07:00:00	Acclimating	A	27.481
2019-06-18	07:30:00	Acclimating	A	27.604
2019-06-18	07:30:00	Acclimating	A	27.554
2019-06-18	07:30:00	Acclimating	A	27.554
2019-06-18	08:00:00	Acclimating	A	27.653
2019-06-18	08:00:00	Acclimating	A	27.653
2019-06-18	08:00:00	Acclimating	A	27.604
2019-06-18	08:30:00	Acclimating	A	27.776
2019-06-18	08:30:00	Acclimating	A	27.801
2019-06-18	08:30:00	Acclimating	A	27.751
2019-06-18	09:00:00	Acclimating	A	27.924
2019-06-18	09:00:00	Acclimating	A	27.949
2019-06-18	09:00:00	Acclimating	A	27.899
2019-06-18	09:30:00	Acclimating	A	28.048
2019-06-18	09:30:00	Acclimating	A	28.072
2019-06-18	09:30:00	Acclimating	A	28.048
2019-06-18	10:00:00	Acclimating	A	28.122
2019-06-18	10:00:00	Acclimating	A	28.171
2019-06-18	10:00:00	Acclimating	A	28.147
2019-06-18	10:30:00	Acclimating	A	28.196
2019-06-18	10:30:00	Acclimating	A	28.147
2019-06-18	10:30:00	Acclimating	A	28.221
2019-06-18	11:00:00	Acclimating	A	28.147
2019-06-18	11:00:00	Acclimating	A	28.245
2019-06-18	11:00:00	Acclimating	A	28.221
2019-06-18	11:30:00	Acclimating	A	28.32
2019-06-18	11:30:00	Acclimating	A	28.345
2019-06-18	11:30:00	Acclimating	A	28.369
2019-06-18	12:00:00	Acclimating	A	28.345
2019-06-18	12:00:00	Acclimating	A	28.444
2019-06-18	12:00:00	Acclimating	A	28.419
2019-06-18	12:30:00	Acclimating	A	28.394
2019-06-18	12:30:00	Acclimating	A	28.444
2019-06-18	12:30:00	Acclimating	A	28.468
2019-06-18	13:00:00	Acclimating	A	28.369
2019-06-18	13:00:00	Acclimating	A	28.468
2019-06-18	13:00:00	Acclimating	A	28.468
2019-06-18	13:30:00	Acclimating	A	28.419
2019-06-18	13:30:00	Acclimating	A	28.468
2019-06-18	13:30:00	Acclimating	A	28.518
2019-06-18	14:00:00	Acclimating	A	28.444
2019-06-18	14:00:00	Acclimating	A	28.468
2019-06-18	14:00:00	Acclimating	A	28.543
2019-06-18	14:30:00	Acclimating	A	28.468
2019-06-18	14:30:00	Acclimating	A	28.568
2019-06-18	14:30:00	Acclimating	A	28.568
2019-06-18	15:00:00	Acclimating	A	28.468
2019-06-18	15:00:00	Acclimating	A	28.518
2019-06-18	15:00:00	Acclimating	A	28.593
2019-06-18	15:30:00	Acclimating	A	28.394
2019-06-18	15:30:00	Acclimating	A	28.468
2019-06-18	15:30:00	Acclimating	A	28.518
2019-06-18	16:00:00	Acclimating	A	28.468
2019-06-18	16:00:00	Acclimating	A	28.394
2019-06-18	16:00:00	Acclimating	A	28.593
2019-06-18	16:30:00	Acclimating	A	28.245
2019-06-18	16:30:00	Acclimating	A	28.221
2019-06-18	16:30:00	Acclimating	A	28.32
2019-06-18	17:00:00	Acclimating	A	28.221
2019-06-18	17:00:00	Acclimating	A	28.097
2019-06-18	17:00:00	Acclimating	A	28.221
2019-06-18	17:30:00	Acclimating	A	28.122
2019-06-18	17:30:00	Acclimating	A	27.998
2019-06-18	17:30:00	Acclimating	A	28.072
2019-06-18	18:00:00	Acclimating	A	27.998
2019-06-18	18:00:00	Acclimating	A	27.85
2019-06-18	18:00:00	Acclimating	A	27.924
2019-06-18	18:30:00	Acclimating	A	27.875
2019-06-18	18:30:00	Acclimating	A	27.727
2019-06-18	18:30:00	Acclimating	A	27.776
2019-06-18	19:00:00	Acclimating	A	27.751
2019-06-18	19:00:00	Acclimating	A	27.628
2019-06-18	19:00:00	Acclimating	A	27.628
2019-06-18	19:30:00	Acclimating	A	27.702
2019-06-18	19:30:00	Acclimating	A	27.579
2019-06-18	19:30:00	Acclimating	A	27.579
2019-06-18	20:00:00	Acclimating	A	27.653
2019-06-18	20:00:00	Acclimating	A	27.53
2019-06-18	20:00:00	Acclimating	A	27.505
2019-06-18	20:30:00	Acclimating	A	27.628
2019-06-18	20:30:00	Acclimating	A	27.505
2019-06-18	20:30:00	Acclimating	A	27.481
2019-06-18	21:00:00	Acclimating	A	27.554
2019-06-18	21:00:00	Acclimating	A	27.456
2019-06-18	21:00:00	Acclimating	A	27.407
2019-06-18	21:30:00	Acclimating	A	27.554
2019-06-18	21:30:00	Acclimating	A	27.456
2019-06-18	21:30:00	Acclimating	A	27.407
2019-06-18	22:00:00	Acclimating	A	27.554
2019-06-18	22:00:00	Acclimating	A	27.456
2019-06-18	22:00:00	Acclimating	A	27.382
2019-06-18	22:30:00	Acclimating	A	27.53
2019-06-18	22:30:00	Acclimating	A	27.431
2019-06-18	22:30:00	Acclimating	A	27.382
2019-06-18	23:00:00	Acclimating	A	27.53
2019-06-18	23:00:00	Acclimating	A	27.456
2019-06-18	23:00:00	Acclimating	A	27.382
2019-06-18	23:30:00	Acclimating	A	27.53
2019-06-18	23:30:00	Acclimating	A	27.456
2019-06-18	23:30:00	Acclimating	A	27.382
2019-06-19	00:00:00	Acclimating	A	27.579
2019-06-19	00:00:00	Acclimating	A	27.481
2019-06-19	00:00:00	Acclimating	A	27.431
2019-06-19	00:30:00	Acclimating	A	27.579
2019-06-19	00:30:00	Acclimating	A	27.481
2019-06-19	00:30:00	Acclimating	A	27.456
2019-06-19	01:00:00	Acclimating	A	27.579
2019-06-19	01:00:00	Acclimating	A	27.456
2019-06-19	01:00:00	Acclimating	A	27.456
2019-06-19	01:30:00	Acclimating	A	27.554
2019-06-19	01:30:00	Acclimating	A	27.431
2019-06-19	01:30:00	Acclimating	A	27.431
2019-06-19	02:00:00	Acclimating	A	27.53
2019-06-19	02:00:00	Acclimating	A	27.407
2019-06-19	02:00:00	Acclimating	A	27.431
2019-06-19	02:30:00	Acclimating	A	27.481
2019-06-19	02:30:00	Acclimating	A	27.382
2019-06-19	02:30:00	Acclimating	A	27.382
2019-06-19	03:00:00	Acclimating	A	27.456
2019-06-19	03:00:00	Acclimating	A	27.358
2019-06-19	03:00:00	Acclimating	A	27.358
2019-06-19	03:30:00	Acclimating	A	27.456
2019-06-19	03:30:00	Acclimating	A	27.358
2019-06-19	03:30:00	Acclimating	A	27.358
2019-06-19	04:00:00	Acclimating	A	27.431
2019-06-19	04:00:00	Acclimating	A	27.333
2019-06-19	04:00:00	Acclimating	A	27.358
2019-06-19	04:30:00	Acclimating	A	27.407
2019-06-19	04:30:00	Acclimating	A	27.284
2019-06-19	04:30:00	Acclimating	A	27.308
2019-06-19	05:00:00	Acclimating	A	27.382
2019-06-19	05:00:00	Acclimating	A	27.284
2019-06-19	05:00:00	Acclimating	A	27.284
2019-06-19	05:30:00	Acclimating	A	27.382
2019-06-19	05:30:00	Acclimating	A	27.284
2019-06-19	05:30:00	Acclimating	A	27.284
2019-06-19	06:00:00	Acclimating	A	27.382
2019-06-19	06:00:00	Acclimating	A	27.284
2019-06-19	06:00:00	Acclimating	A	27.259
2019-06-19	06:30:00	Acclimating	A	27.407
2019-06-19	06:30:00	Acclimating	A	27.308
2019-06-19	06:30:00	Acclimating	A	27.284
2019-06-19	07:00:00	Acclimating	A	27.431
2019-06-19	07:00:00	Acclimating	A	27.358
2019-06-19	07:00:00	Acclimating	A	27.308
2019-06-19	07:30:00	Acclimating	A	27.53
2019-06-19	07:30:00	Acclimating	A	27.456
2019-06-19	07:30:00	Acclimating	A	27.382
2019-06-19	08:00:00	Acclimating	A	27.579
2019-06-19	08:00:00	Acclimating	A	27.53
2019-06-19	08:00:00	Acclimating	A	27.456
2019-06-19	08:30:00	Acclimating	A	27.702
2019-06-19	08:30:00	Acclimating	A	27.677
2019-06-19	08:30:00	Acclimating	A	27.579
2019-06-19	09:00:00	Acclimating	A	27.875
2019-06-19	09:00:00	Acclimating	A	27.85
2019-06-19	09:00:00	Acclimating	A	27.751
2019-06-19	09:30:00	Acclimating	A	27.875
2019-06-19	09:30:00	Acclimating	A	27.85
2019-06-19	09:30:00	Acclimating	A	27.801
2019-06-19	10:00:00	Acclimating	A	27.949
2019-06-19	10:00:00	Acclimating	A	27.924
2019-06-19	10:00:00	Acclimating	A	27.875
2019-06-19	10:30:00	Acclimating	A	28.023
2019-06-19	10:30:00	Acclimating	A	27.974
2019-06-19	10:30:00	Acclimating	A	27.949
2019-06-19	11:00:00	Acclimating	A	28.097
2019-06-19	11:00:00	Acclimating	A	28.048
2019-06-19	11:00:00	Acclimating	A	28.023
2019-06-19	11:30:00	Acclimating	A	28.048
2019-06-19	11:30:00	Acclimating	A	28.023
2019-06-19	11:30:00	Acclimating	A	27.998
2019-06-19	12:00:00	Acclimating	A	28.221
2019-06-19	12:00:00	Acclimating	A	28.122
2019-06-19	12:00:00	Acclimating	A	28.147
2019-06-19	12:30:00	Acclimating	A	28.27
2019-06-19	12:30:00	Acclimating	A	28.196
2019-06-19	12:30:00	Acclimating	A	28.196
2019-06-19	13:00:00	Acclimating	A	28.493
2019-06-19	13:00:00	Acclimating	A	28.493
2019-06-19	13:00:00	Acclimating	A	28.369
2019-06-19	13:30:00	Acclimating	A	28.493
2019-06-19	13:30:00	Acclimating	A	28.32
2019-06-19	13:30:00	Acclimating	A	28.444
2019-06-19	14:00:00	Acclimating	A	28.543
2019-06-19	14:00:00	Acclimating	A	28.468
2019-06-19	14:00:00	Acclimating	A	28.493
2019-06-19	14:30:00	Acclimating	A	28.692
2019-06-19	14:30:00	Acclimating	A	28.667
2019-06-19	14:30:00	Acclimating	A	28.642
2019-06-19	15:00:00	Acclimating	A	28.568
2019-06-19	15:00:00	Acclimating	A	28.518
2019-06-19	15:00:00	Acclimating	A	28.642
2019-06-19	15:30:00	Acclimating	A	28.468
2019-06-19	15:30:00	Acclimating	A	28.369
2019-06-19	15:30:00	Acclimating	A	28.568
2019-06-19	16:00:00	Acclimating	A	28.196
2019-06-19	16:00:00	Acclimating	A	28.048
2019-06-19	16:00:00	Acclimating	A	28.32
2019-06-19	16:30:00	Acclimating	A	27.998
2019-06-19	16:30:00	Acclimating	A	27.875
2019-06-19	16:30:00	Acclimating	A	28.122
2019-06-19	17:00:00	Acclimating	A	27.825
2019-06-19	17:00:00	Acclimating	A	27.702
2019-06-19	17:00:00	Acclimating	A	27.875
2019-06-19	17:30:00	Acclimating	A	27.727
2019-06-19	17:30:00	Acclimating	A	27.604
2019-06-19	17:30:00	Acclimating	A	27.727
2019-06-19	18:00:00	Acclimating	A	27.677
2019-06-19	18:00:00	Acclimating	A	27.554
2019-06-19	18:00:00	Acclimating	A	27.628
2019-06-19	18:30:00	Acclimating	A	27.628
2019-06-19	18:30:00	Acclimating	A	27.505
2019-06-19	18:30:00	Acclimating	A	27.579
2019-06-19	19:00:00	Acclimating	A	27.53
2019-06-19	19:00:00	Acclimating	A	27.407
2019-06-19	19:00:00	Acclimating	A	27.431
2019-06-19	19:30:00	Acclimating	A	27.481
2019-06-19	19:30:00	Acclimating	A	27.358
2019-06-19	19:30:00	Acclimating	A	27.358
2019-06-19	20:00:00	Acclimating	A	27.407
2019-06-19	20:00:00	Acclimating	A	27.284
2019-06-19	20:00:00	Acclimating	A	27.284
2019-06-19	20:30:00	Acclimating	A	27.382
2019-06-19	20:30:00	Acclimating	A	27.284
2019-06-19	20:30:00	Acclimating	A	27.235
2019-06-19	21:00:00	Acclimating	A	27.358
2019-06-19	21:00:00	Acclimating	A	27.284
2019-06-19	21:00:00	Acclimating	A	27.235
2019-06-19	21:30:00	Acclimating	A	27.358
2019-06-19	21:30:00	Acclimating	A	27.259
2019-06-19	21:30:00	Acclimating	A	27.21
2019-06-19	22:00:00	Acclimating	A	27.333
2019-06-19	22:00:00	Acclimating	A	27.235
2019-06-19	22:00:00	Acclimating	A	27.186
2019-06-19	22:30:00	Acclimating	A	27.308
2019-06-19	22:30:00	Acclimating	A	27.21
2019-06-19	22:30:00	Acclimating	A	27.136
2019-06-19	23:00:00	Acclimating	A	27.284
2019-06-19	23:00:00	Acclimating	A	27.186
2019-06-19	23:00:00	Acclimating	A	27.112
2019-06-19	23:30:00	Acclimating	A	27.284
2019-06-19	23:30:00	Acclimating	A	27.186
2019-06-19	23:30:00	Acclimating	A	27.112
2019-06-20	00:00:00	Acclimating	A	27.235
2019-06-20	00:00:00	Acclimating	A	27.136
2019-06-20	00:00:00	Acclimating	A	27.087
2019-06-20	00:30:00	Acclimating	A	27.21
2019-06-20	00:30:00	Acclimating	A	27.112
2019-06-20	00:30:00	Acclimating	A	27.038
2019-06-20	01:00:00	Acclimating	A	27.186
2019-06-20	01:00:00	Acclimating	A	27.136
2019-06-20	01:00:00	Acclimating	A	27.038
2019-06-20	01:30:00	Acclimating	A	27.235
2019-06-20	01:30:00	Acclimating	A	27.136
2019-06-20	01:30:00	Acclimating	A	27.063
2019-06-20	02:00:00	Acclimating	A	27.21
2019-06-20	02:00:00	Acclimating	A	27.112
2019-06-20	02:00:00	Acclimating	A	27.038
2019-06-20	02:30:00	Acclimating	A	27.21
2019-06-20	02:30:00	Acclimating	A	27.136
2019-06-20	02:30:00	Acclimating	A	27.063
2019-06-20	03:00:00	Acclimating	A	27.21
2019-06-20	03:00:00	Acclimating	A	27.112
2019-06-20	03:00:00	Acclimating	A	27.087
2019-06-20	03:30:00	Acclimating	A	27.161
2019-06-20	03:30:00	Acclimating	A	27.112
2019-06-20	03:30:00	Acclimating	A	27.087
2019-06-20	04:00:00	Acclimating	A	27.161
2019-06-20	04:00:00	Acclimating	A	27.087
2019-06-20	04:00:00	Acclimating	A	27.087
2019-06-20	04:30:00	Acclimating	A	27.112
2019-06-20	04:30:00	Acclimating	A	27.038
2019-06-20	04:30:00	Acclimating	A	27.014
2019-06-20	05:00:00	Acclimating	A	27.112
2019-06-20	05:00:00	Acclimating	A	27.038
2019-06-20	05:00:00	Acclimating	A	26.989
2019-06-20	05:30:00	Acclimating	A	27.087
2019-06-20	05:30:00	Acclimating	A	26.989
2019-06-20	05:30:00	Acclimating	A	26.94
2019-06-20	06:00:00	Acclimating	A	27.063
2019-06-20	06:00:00	Acclimating	A	26.94
2019-06-20	06:00:00	Acclimating	A	26.891
2019-06-20	06:30:00	Acclimating	A	27.063
2019-06-20	06:30:00	Acclimating	A	26.94
2019-06-20	06:30:00	Acclimating	A	26.842
2019-06-20	07:00:00	Acclimating	A	27.112
2019-06-20	07:00:00	Acclimating	A	27.014
2019-06-20	07:00:00	Acclimating	A	26.867
2019-06-20	07:30:00	Acclimating	A	27.186
2019-06-20	07:30:00	Acclimating	A	27.087
2019-06-20	07:30:00	Acclimating	A	26.965
2019-06-20	08:00:00	Acclimating	A	27.186
2019-06-20	08:00:00	Acclimating	A	27.136
2019-06-20	08:00:00	Acclimating	A	26.989
2019-06-20	08:30:00	Acclimating	A	27.481
2019-06-20	08:30:00	Acclimating	A	27.554
2019-06-20	08:30:00	Acclimating	A	27.284
2019-06-20	09:00:00	Acclimating	A	27.899
[truncated: 33,421 more rows]

## Sheet: Calcification Rate
Species	Treatment	Tank	End_Acclimation	End_Heating
Ls	A	1	1.431	1.226
Ls	A	1	1.006	0.892
Ls	A	1	1.496	1.417
Ls	A	1	1.709	1.547
Ls	A	1	0.48	1.209
Ls	A	1	1.2	0.995
Ls	A	1	1.145	1.085
Ls	A	1	1.233	1.201
Ls	A	1	1.588	1.447
Ls	A	1	1.421	1.386
Ls	A	4	1.366	1.241
Ls	A	4	1.219	1.365
Ls	A	4	1.485	1.624
Ls	A	4	1.303	1.316
Ls	A	4	1.401	1.342
Ls	A	4	-1.8	1.015
Ls	A	4	2.147	1.421
Ls	A	4	0.919	1.083
Ls	A	4	1.382	1.62
Ls	A	4	1.557	1.32
Ls	A	11	1.088	1.645
Ls	A	11	1.203	1.203
Ls	A	11	1.099	0.958
Ls	A	11	1.27	1.236
Ls	A	11	1.214	1.185
Ls	A	11	1.142	1.093
Ls	A	11	1.156	1.207
Ls	A	11	1.622	1.574
Ls	A	11	1.062	0.901
Mc	A	1	1.255	1.427
Mc	A	1	0.984	1.144
Mc	A	1	1.723	1.897
Mc	A	1	1.532	1.615
Mc	A	1	1.341	1.403
Mc	A	1	-0.776	1.184
Mc	A	1	1.358	0.961
Mc	A	4	1.782	1.777
Mc	A	4	1.608	1.428
Mc	A	4	1.754	1.493
Mc	A	4	1.882	1.733
Mc	A	4	1.603	1.703
Mc	A	4	1.434	1.558
Mc	A	4	1.838	1.864
Mc	A	11	1.583	1.486
Mc	A	11	1.317	1.334
Mc	A	11	1.943	1.842
Mc	A	11	0.877	1.225
Mc	A	11	1.733	1.863
Mc	A	11	1.598	1.41
Mc	A	11	1.271	-1.78
Mc	A	11	1.769	1.858
Mc	A	11	1.743	1.469
Pa	A	1	1.408	1.438
Pa	A	1	1.546	1.522
Pa	A	1	1.311	1.466
Pa	A	1	0.495	2.054
Pa	A	1	1.246	1.4
Pa	A	1	1.224	1.228
Pa	A	1	1.296	1.29
Pa	A	1	0.993	1.003
Pa	A	1	1.634	1.68
Pa	A	1	1.806	1.824
Pa	A	4	1.228	1.413
Pa	A	4	1.463	1.552
Pa	A	4	1.234	1.517
Pa	A	4	1.217	1.339
Pa	A	4	1.07	1.119
Pa	A	4	1.231	1.418
Pa	A	4	1.085	1.704
Pa	A	4	1.115	1.089
Pa	A	4	1.232	1.297
Pa	A	11	1.724	1.667
Pa	A	11	1.635	1.567
Pa	A	11	1.56	1.408
Pa	A	11	1.469	1.559
Pa	A	11	1.916	1.679
Pa	A	11	1.339	1.245
Pa	A	11	1.207	1.229
Pa	A	11	1.286	1.308
Pa	A	11	-0.977	1.476
Pa	A	11	1.566	1.528
Ls	H	2	1.144	0.901
Ls	H	2	1.472	0.942
Ls	H	2	1.464	1.303
Ls	H	2	1.449	-1.135
Ls	H	2	2.225	-1.727
Ls	H	2	2.287	-1.128
Ls	H	2	-0.763	-1.504
Ls	H	2	0.666	-1.215
Ls	H	2	2.207	-1.414
Ls	H	2	0.953	0.896
Ls	H	6	1.282	0.623
Ls	H	6	1.196	0.786
Ls	H	6	0.667	-0.494
Ls	H	6	1.034	0.712
Ls	H	6	1.372	1.023
Ls	H	6	1.186	0.891
Ls	H	6	0.939	0.526
Ls	H	6	1.189	0.889
Ls	H	6	1.447	1.102
Ls	H	6	1.323	0.856
Ls	H	7	1.35	0.742
Ls	H	7	1.611	1.12
Ls	H	7	1.673	0.84
Ls	H	7	1.794	1.338
Ls	H	7	1.247	0.784
Ls	H	7	1.177	0.891
Ls	H	7	1.309	0.652
Ls	H	7	0.741	-0.321
Ls	H	7	1.181	0.781
Ls	H	7	1.46	1.084
Mc	H	2	0.446	-0.932
Mc	H	2	2.332	-1.571
Mc	H	2	2.284	-0.694
Mc	H	2	2.394	-1.346
Mc	H	2	2.241	-1.321
Mc	H	2	2.16	-1.372
Mc	H	2	2.373	-0.363
Mc	H	2	-0.664	1.906
Mc	H	2	1.39	-0.777
Mc	H	6	1.733	1.331
Mc	H	6	1.611	1.203
Mc	H	6	1.429	1.163
Mc	H	6	1.444	-0.889
Mc	H	6	1.363	0.988
Mc	H	6	1.177	-0.168
Mc	H	6	2.584	-1.783
Mc	H	6	1.681	1.251
Mc	H	6	1.8
Mc	H	6	1.553	1.262
Mc	H	7	1.646	-0.626
Mc	H	7	1.82	1.111
Mc	H	7	1.237	0.737
Mc	H	7	1.019	1.141
Mc	H	7	1.62	0.54
Mc	H	7	1.677	0.869
Mc	H	7	1.559	0.864
Mc	H	7	1.572	0.851
Mc	H	7	1.588	1.124
Mc	H	7	1.554	0.647
Pa	H	2	1.974	1.317
Pa	H	2	1.844	-1.274
Pa	H	2	2.154	-1.495
Pa	H	2	1.901	-1.391
Pa	H	2	1.916	-0.89
Pa	H	2	1.809	-1.76
Pa	H	2	2.035	-1.443
Pa	H	2	1.893	-1.22
Pa	H	2	2.043	-1.737
Pa	H	2	2.033	-1.53
Pa	H	6	1.174	0.533
Pa	H	6	-0.89	0.935
Pa	H	6	1.557	-0.59
Pa	H	6	1.358	0.747
Pa	H	6	1.342	0.838
Pa	H	6	1.633	-0.79
Pa	H	6	1.515	0.836
Pa	H	6	1.278	0.732
Pa	H	6	1.773	1.006
Pa	H	6	1.399	0.725
Pa	H	7	1.436	-0.8
Pa	H	7	1.363
Pa	H	7	1.288	0.828
Pa	H	7	1.126
Pa	H	7	1.383
Pa	H	7	1.495	-0.522
Pa	H	7	1.211
Pa	H	7	0.904
Pa	H	7	1.311
Ls	N	5	1.378	1.281
Ls	N	5	1.256	1.211
Ls	N	5	1.202	1.057
Ls	N	5	1.391	1.201
Ls	N	5	1.217	1.217
Ls	N	5	1.184	1.076
Ls	N	5	1.047	0.938
Ls	N	5	1.604	1.987
Ls	N	5	1.408	1.374
Ls	N	9	1.428	1.438
Ls	N	9	1.205	1.05
Ls	N	9	1.246	1.152
Ls	N	9	1.247	1.033
Ls	N	9	1.484	1.359
Ls	N	9	1.278	-0.562
Ls	N	9	1.376	1.267
Ls	N	9	1.187	1.224
Ls	N	9	1.129	0.821
Ls	N	9	1.133	1.17
Ls	N	10	0.714	0.452
Ls	N	10	1.244	1.154
Ls	N	10	1.364	1.202
Ls	N	10	1.186	1.121
Ls	N	10	1.504	1.462
Ls	N	10	1.053	0.999
Ls	N	10	1.007	0.828
Ls	N	10	1.369	1.28
Ls	N	10	1.048	0.994
Ls	N	10	0.908	0.99
Mc	N	5	1.751	1.887
Mc	N	5	1.102	-0.699
Mc	N	5	1.607	1.581
Mc	N	5	1.663	1.518
Mc	N	5	1.725	1.657
Mc	N	5	1.564	1.445
Mc	N	5	1.33	1.039
Mc	N	5	1.759	1.455
Mc	N	5	1.71	1.628
Mc	N	5	1.61	1.377
Mc	N	9	1.322	1.532
Mc	N	9	1.713	1.368
Mc	N	9	1.432	1.272
Mc	N	9	1.572	1.492
Mc	N	9	1.742	1.784
Mc	N	9	1.668	1.434
Mc	N	9	1.597	1.581
Mc	N	9	1.513	1.591
Mc	N	9	1.516	1.425
Mc	N	10	1.318	1.538
Mc	N	10	0.959	1.273
Mc	N	10	1.488	1.631
Mc	N	10	1.305	1.429
Mc	N	10	1.301	1.524
Mc	N	10	-1.031	1.195
Mc	N	10	1.286	1.447
Mc	N	10	1.579	1.922
Mc	N	10	1.007	0.837
Mc	N	10	1.361	1.597
Pa	N	5	1.5	1.502
Pa	N	5	1.481	1.373
Pa	N	5	1.466	1.318
Pa	N	5	1.33	1.519
Pa	N	5	0.821	0.836
Pa	N	5	1.678	1.782
Pa	N	5	0.956	0.878
Pa	N	5	1.799	-1.317
Pa	N	5	1.009	0.971
Pa	N	5	1.501	1.569
Pa	N	9	1.009	1.019
Pa	N	9	0.926	0.894
Pa	N	9	1.591	1.498
Pa	N	9	1.467	1.52
Pa	N	9	1.069	1.035
Pa	N	9	1.314	1.111
Pa	N	9	1.465	1.526
Pa	N	9	1.447	1.351
Pa	N	9	1.48	1.504
Pa	N	9	0.826	0.654
Pa	N	10	0.952	1.204
Pa	N	10	1.432	1.536
Pa	N	10	1.262	1.313
Pa	N	10	-0.971	1.642
Pa	N	10	1.215	1.49
Pa	N	10	0.679	1.225
Pa	N	10	1.369	1.509
Pa	N	10	0.44	0.831
Pa	N	10	1.392	1.271
Ls	NH	3	1.171	0.794
Ls	NH	3	1.098	1.119
Ls	NH	3	1.327	1.294
Ls	NH	3	1.073
Ls	NH	3	1.449	1.07
Ls	NH	3	1.097	0.817
Ls	NH	3	2.922	1.093
Ls	NH	3	1.615	1.379
Ls	NH	3	2.71	1.053
Ls	NH	3	0.85	0.743
Ls	NH	12	1.615
Ls	NH	12	0.825	0.19
Ls	NH	12	0.656	-0.313
Ls	NH	12	1.434	0.894
Ls	NH	12	1.326	0.589
Ls	NH	12	0.586	-0.291
Ls	NH	12	0.824	0.545
Ls	NH	12	0.983
Ls	NH	12	1.075	0.65
Ls	NH	12	0.941	0.664
Mc	NH	3	-1.202	1.049
Mc	NH	3	1.744	1.371
Mc	NH	3	1.595
Mc	NH	3	1.695
Mc	NH	3	1.784	1.518
Mc	NH	3	2.015	1.468
Mc	NH	3	1.366	0.937
Mc	NH	3	1.961	1.443
Mc	NH	3	1.606	0.517
Mc	NH	3	0.919	-0.915
Mc	NH	12	1.538	-1.45
Mc	NH	12	1.482	1.087
Mc	NH	12	1.289	-1.002
Mc	NH	12	1.924	0.694
Mc	NH	12	1.612	0.849
Mc	NH	12	1.351	0.933
Mc	NH	12	1.616	1.338
Mc	NH	12	1.238	-0.553
Mc	NH	12	1.604	0.399
Pa	NH	3	1.56	1.35
Pa	NH	3	-1.89	0.827
Pa	NH	3	1.037	0.88
Pa	NH	3	1.402	1.075
Pa	NH	3	1.256	0.778
Pa	NH	3	1.478	1.177
Pa	NH	3	1.028	0.941
Pa	NH	3	1.202	0.718
Pa	NH	3	-1.18
Pa	NH	12	1.456	0.687
Pa	NH	12	1.497	0.877
Pa	NH	12	1.223	0.475
Pa	NH	12	1.503	0.745
Pa	NH	12	1.349	0.708
Pa	NH	12	1.016
Pa	NH	12	0.852	-0.872
Pa	NH	12	1.126	-0.568
Pa	NH	12	1.288
Pa	NH	12	1.262	-0.721

## Sheet: Days to Bleaching
Treatment	Species	DTB
H	Ls	19
H	Ls	21
H	Ls	17
H	Ls	24
H	Ls	17
H	Ls	17
H	Ls	31
H	Ls	17
H	Ls	17
H	Ls	17
H	Ls	17
H	Ls	14
H	Ls	17
H	Ls	14
H	Ls	5
H	Ls	14
H	Ls	17
H	Ls	17
H	Ls	14
H	Ls	14
H	Ls	14
H	Ls	14
H	Ls	19
H	Ls	12
H	Ls	14
H	Ls	14
H	Ls	14
H	Ls	24
H	Ls	14
H	Ls	14
H	Mc	19
H	Mc	24
H	Mc	26
H	Mc	19
H	Mc	28
H	Mc	19
H	Mc	19
H	Mc	26
H	Mc	17
H	Mc	26
H	Mc	19
H	Mc	26
H	Mc	19
H	Mc	26
H	Mc	19
H	Mc	19
H	Mc	21
H	Mc	19
H	Mc	19
H	Mc	19
H	Mc	19
H	Mc	17
H	Mc	19
H	Mc	12
H	Mc	19
H	Mc	17
H	Mc	17
H	Mc	12
H	Mc	17
H	Pa	19
H	Pa	24
H	Pa	17
H	Pa	17
H	Pa	19
H	Pa	17
H	Pa	24
H	Pa	26
H	Pa	24
H	Pa	19
H	Pa	19
H	Pa	19
H	Pa	17
H	Pa	19
H	Pa	19
H	Pa	17
H	Pa	19
H	Pa	19
H	Pa	17
H	Pa	19
H	Pa	17
H	Pa	12
H	Pa	17
H	Pa	12
H	Pa	12
H	Pa	12
H	Pa	19
NH	Ls	24
NH	Ls	24
NH	Ls	24
NH	Ls	24
NH	Ls	26
NH	Ls	24
NH	Ls	31
NH	Ls	14
NH	Ls	26
NH	Ls	21
NH	Ls	14
NH	Ls	14
NH	Ls	14
NH	Ls	17
NH	Ls	17
NH	Ls	21
NH	Ls	14
NH	Mc	26
NH	Mc	26
NH	Mc	28
NH	Mc	31
NH	Mc	24
NH	Mc	31
NH	Mc	24
NH	Mc	26
NH	Mc	26
NH	Mc	19
NH	Mc	19
NH	Mc	19
NH	Mc	26
NH	Mc	19
NH	Mc	19
NH	Mc	21
NH	Mc	12
NH	Pa	26
NH	Pa	26
NH	Pa	26
NH	Pa	26
NH	Pa	19
NH	Pa	19
NH	Pa	24
NH	Pa	24
NH	Pa	19
NH	Pa	19
NH	Pa	19
NH	Pa	17
NH	Pa	19
NH	Pa	19
NH	Pa	17
NH	Pa	19
NH	Pa	17

## Sheet: Partial Bleaching
* = Coral position was used in lieu of tag number when tag was missing
Treatment	Species	Number	Tank	Row	Colum	End_acclimation	End_heating
A	Ls	5	1	1	3	0	0
A	Ls	4	1	1	5	0	0
A	Ls	46	1	2	1	0	0
A	Ls	69	1	2	2	0	0
A	Ls	76	1	2	6	0	0
A	Ls	3	1	3	3	0	0
A	Ls	93	1	3	4	0	0
A	Ls	*	1	4	1	0	0
A	Ls	*	1	4	6	0	0
A	Ls	2	1	5	2	0	0
A	Ls	47	4	1	2	0	0
A	Ls	32	4	1	4	0	0
A	Ls	*	4	2	2	0	0
A	Ls	61	4	2	5	0	0
A	Ls	65	4	2	6	0	0
A	Ls	*	4	4	2	0	0
A	Ls	*	4	4	4	0	0
A	Ls	*	4	4	6	0	0
A	Ls	98	4	5	1	0	0
A	Ls	*	4	5	4	0	0
A	Ls	68	11	1	6	0	0
A	Ls	110	11	2	1	0	0
A	Ls	101	11	2	5	0	0
A	Ls	63	11	3	3	0	0
A	Ls	10	11	3	4	0	0
A	Ls	97	11	4	1	0	0
A	Ls	52	11	4	2	0	0
A	Ls	119	11	5	1	0	0
A	Ls	44	11	5	2	0	0
A	Mc	62	1	1	4	0	0
A	Mc	64	1	2	5	0	0
A	Mc	67	1	3	1	0	0
A	Mc	96	1	3	6	0	0
A	Mc	38	1	4	2	0	0
A	Mc	29	1	4	5	0	0
A	Mc	106	1	5	6	0	0
A	Mc	46	4	1	1	0	0
A	Mc	30	4	1	5	0	0
A	Mc	70	4	2	3	0	0
A	Mc	77	4	3	1	0	0
A	Mc	50	4	4	3	0	0
A	Mc	16	4	5	2	0	0
A	Mc	79	4	5	6	0	0
A	Mc	*	11	1	2	0	0
A	Mc	95	11	1	3	0	0
A	Mc	102	11	2	3	0	0
A	Mc	112	11	2	4	0	0
A	Mc	53	11	2	6	0	0
A	Mc	92	11	3	6	0	0
A	Mc	93	11	4	4	0	0
A	Mc	105	11	4	5	0	0
A	Mc	100	11	5	3	0	0
A	Pa	109	1	1	1	0	0
A	Pa	24	1	1	2	0	0
A	Pa	52	1	2	3	0	0
A	Pa	65	1	2	4	0	0
A	Pa	4	1	3	5	0	0
A	Pa	73	1	4	3	0	0
A	Pa	38	1	4	4	0	0
A	Pa	75	1	5	1	0	0
A	Pa	53	1	5	4	0	0
A	Pa	1	1	5	5	0	0
A	Pa	25	4	1	3	0	0
A	Pa	50	4	2	1	0	0
A	Pa	118	4	3	2	0	0
A	Pa	104	4	3	3	0	0
A	Pa	55	4	3	5	0	0
A	Pa	101	4	3	6	0	0
A	Pa	33	4	4	1	0	0
A	Pa	97	4	4	5	0	0
A	Pa	105	4	5	3	0	0
A	Pa	78	11	1	1	0	0
A	Pa	84	11	1	4	0	0
A	Pa	95	11	3	1	0	0
A	Pa	80	11	3	2	0	0
A	Pa	14	11	3	5	0	0
A	Pa	86	11	4	3	0	0
A	Pa	100	11	4	6	0	0
A	Pa	81	11	5	4	0	0
A	Pa	85	11	5	5	0	0
A	Pa	15	11	5	6	0	0
H	Ls	117	2	1	1	0	100
H	Ls	94	2	1	2	0	100
H	Ls	*	2	1	5	0	100
H	Ls	*	2	1	6	0	100
H	Ls	59	2	2	3	0	100
H	Ls	22	2	2	5	0	100
H	Ls	51	2	3	1	0	100
H	Ls	115	2	4	2	0	100
H	Ls	*	2	4	5	0	100
H	Ls	*	2	5	6	0	0
H	Ls	39	6	1	2	0	100
H	Ls	*	6	2	2	0	100
H	Ls	*	6	2	6	0	100
H	Ls	15	6	3	1	0	100
H	Ls	34	6	3	3	0	100
H	Ls	75	6	4	5	0	100
H	Ls	31	6	4	6	0	100
H	Ls	106	6	5	1	0	100
H	Ls	*	6	5	4	0	100
H	Ls	71	6	5	5	0	100
H	Ls	*	7	1	6	0	100
H	Ls	113	7	2	3	0	95
H	Ls	66	7	2	5	0	100
H	Ls	64	7	3	1	0	100
H	Ls	26	7	3	4	0	100
H	Ls	95	7	3	6	0	100
H	Ls	*	7	4	1	0	100
H	Ls	24	7	4	5	0	0
H	Ls	*	7	5	2	0	100
H	Ls	57	7	5	5	0	100
H	Mc	15	2	1	4	0	100
H	Mc	94	2	2	1	0	100
H	Mc	78	2	3	2	0	100
H	Mc	108	2	3	4	0	100
H	Mc	109	2	3	6	0	100
H	Mc	58	2	4	6	0	70
H	Mc	18	2	5	2	0	100
H	Mc	65	2	5	4	0	50
H	Mc	20	2	5	5	0	100
H	Mc	5	6	1	1	0	100
H	Mc	22	6	1	4	0	95
H	Mc	81	6	1	6	0	100
H	Mc	117	6	2	3	0	100
H	Mc	54	6	2	5	0	100
H	Mc	110	6	3	6	0	100
H	Mc	42	6	4	2	0	60
H	Mc	84	6	4	4	0	100
H	Mc	76	6	5	2	0	10
H	Mc	6	6	5	3	0	100
H	Mc	73	7	1	3	0	100
H	Mc	66	7	1	4	0	100
H	Mc	21	7	1	5	0	100
H	Mc	31	7	2	2	0	95
H	Mc	27	7	2	4	0	100
H	Mc	11	7	3	2	0	100
H	Mc	57	7	4	6	0	95
H	Mc	55	7	5	1	0	75
H	Mc	82	7	5	3	0	100
H	Mc	1	7	5	6	0	100
H	Pa	29	2	1	3	0	50
H	Pa	31	2	2	2	0	100
H	Pa	76	2	2	4	0	100
H	Pa	42	2	2	6	0	100
H	Pa	27	2	3	3	0	100
H	Pa	35	2	3	5	0	100
H	Pa	21	2	4	1	0	0
H	Pa	79	2	4	3	0	100
H	Pa	89	2	4	4	0	100
H	Pa	48	2	5	3	0	100
H	Pa	108	6	1	3	0	100
H	Pa	83	6	1	5	0	95
H	Pa	63	6	2	1	0	100
H	Pa	93	6	2	4	0	100
H	Pa	20	6	3	2	0	100
H	Pa	5	6	3	4	0	100
H	Pa	28	6	3	5	0	50
H	Pa	36	6	4	1	0	100
H	Pa	2	6	4	3	0	100
H	Pa	8	6	5	6	0	100
H	Pa	46	7	1	1	0	100
H	Pa	106	7	1	2	0	0
H	Pa	56	7	2	6	0	100
H	Pa	94	7	3	3	0	0
H	Pa	47	7	3	5	0	0
H	Pa	11	7	4	2	0	95
H	Pa	68	7	4	3	0	20
H	Pa	107	7	4	4	20	0
H	Pa	66	7	5	4	0	40
N	Ls	*	5	1	1	0	0
N	Ls	*	5	1	4	0	0
N	Ls	48	5	2	1	0	0
N	Ls	*	5	2	2	0	0
N	Ls	*	5	2	4	0	0
N	Ls	85	5	3	2	0	0
N	Ls	99	5	3	6	0	0
N	Ls	*	5	4	1	0	0
N	Ls	19	5	5	3	0	0
N	Ls	45	9	1	2	0	0
N	Ls	103	9	1	3	0	0
N	Ls	27	9	2	1	0	0
N	Ls	*	9	2	5	0	0
N	Ls	*	9	3	2	0	0
N	Ls	28	9	3	6	0	0
N	Ls	36	9	4	4	0	0
N	Ls	33	9	5	1	0	0
N	Ls	102	9	5	4	0	0
N	Ls	112	9	5	6	0	0
N	Ls	67	10	1	1	0	0
N	Ls	*	10	1	6	0	0
N	Ls	62	10	2	1	0	0
N	Ls	40	10	2	2	0	0
N	Ls	116	10	2	4	0	0
N	Ls	*	10	3	4	0	0
N	Ls	77	10	3	6	0	0
N	Ls	115	10	4	3	0	0
N	Ls	92	10	4	4	0	0
N	Ls	105	10	5	1	0	0
N	Mc	33	5	1	3	0	0
N	Mc	68	5	1	5	0	0
N	Mc	25	5	2	6	0	0
N	Mc	120	5	3	1	0	0
N	Mc	118	5	3	4	0	0
N	Mc	91	5	4	3	0	0
N	Mc	63	5	4	6	0	0
N	Mc	52	5	5	2	0	0
N	Mc	28	5	5	5	0	0
N	Mc	49	5	5	6	0	0
N	Mc	48	9	2	2	0	0
N	Mc	75	9	2	3	0	0
N	Mc	50	9	3	1	0	0
N	Mc	88	9	4	1	0	0
N	Mc	119	9	4	3	0	0
N	Mc	71	9	4	6	0	0
N	Mc	61	9	5	2	0	0
N	Mc	103	9	5	3	0	0
N	Mc	37	9	5	5	0	0
N	Mc	9	10	1	2	0	0
N	Mc	3	10	2	5	0	0
N	Mc	41	10	2	6	0	0
N	Mc	45	10	3	2	0	0
N	Mc	44	10	3	3	0	0
N	Mc	36	10	3	5	0	0
N	Mc	89	10	4	1	0	0
N	Mc	8	10	4	6	0	0
N	Mc	114	10	5	3	0	0
N	Mc	113	10	5	5	0	0
N	Pa	92	5	1	2	0	25
N	Pa	69	5	1	6	0	0
N	Pa	116	5	2	3	0	0
N	Pa	44	5	2	5	0	0
N	Pa	82	5	3	3	0	0
N	Pa	17	5	3	5	0	0
N	Pa	32	5	4	4	0	0
N	Pa	72	5	4	5	0	0
N	Pa	83	5	5	1	0	0
N	Pa	119	5	5	4	0	0
N	Pa	39	9	1	1	0	0
N	Pa	71	9	1	5	0	0
N	Pa	30	9	1	6	0	0
N	Pa	87	9	2	4	0	0
N	Pa	58	9	2	6	0	0
N	Pa	12	9	3	3	0	0
N	Pa	6	9	3	4	0	0
N	Pa	77	9	3	5	0	0
N	Pa	91	9	4	2	0	0
N	Pa	120	9	4	5	0	0
N	Pa	96	10	1	3	0	0
N	Pa	9	10	1	4	0	0
N	Pa	99	10	1	5	0	0
N	Pa	13	10	2	3	0	0
N	Pa	74	10	3	1	0	0
N	Pa	117	10	4	2	0	0
N	Pa	51	10	5	2	0	0
N	Pa	10	10	5	4	0	0
N	Pa	16	10	5	6	0	0
NH	Ls	*	3	1	2	0	0
NH	Ls	*	3	1	3	0	100
NH	Ls	*	3	2	1	0	100
NH	Ls	37	3	2	3	0	0
NH	Ls	*	3	2	6	0	0
NH	Ls	*	3	3	1	0	100
NH	Ls	21	3	3	4	0	90
NH	Ls	121	3	5	1	0	100
NH	Ls	20	3	5	5	0	100
NH	Ls	89	3	5	6	0	0
NH	Ls	60	12	1	1	0	0
NH	Ls	107	12	1	6	0	0
NH	Ls	53	12	2	2	0	0
NH	Ls	109	12	2	4	0	100
NH	Ls	*	12	3	2	0	100
NH	Ls	9	12	3	5	0	0
NH	Ls	13	12	4	1	0	100
NH	Ls	56	12	4	6	0	0
NH	Ls	50	12	5	3	0	0
NH	Ls	120	12	5	5	0	100
NH	Mc	26	3	1	1	0	0
NH	Mc	47	3	1	4	0	100
NH	Mc	40	3	2	4	0	100
NH	Mc	90	3	2	5	0	100
NH	Mc	51	3	3	2	0	100
NH	Mc	7	3	3	3	0	100
NH	Mc	43	3	3	5	0	100
NH	Mc	4	3	4	2	0	100
NH	Mc	98	3	4	4	0	50
NH	Mc	69	3	4	6	0	70
NH	Mc	72	12	1	2	0	80
NH	Mc	124	12	1	4	0	100
NH	Mc	111	12	2	1	0	0
NH	Mc	39	12	2	5	0	50
NH	Mc	59	12	2	6	0	90
NH	Mc	116	12	3	4	0	90
NH	Mc	2	12	4	4	0	100
NH	Mc	23	12	5	1	0	50
NH	Mc	86	12	5	6	0	80
NH	Pa	112	3	1	5	0	50
NH	Pa	113	3	1	6	0	100
NH	Pa	70	3	2	2	0	0
NH	Pa	54	3	3	6	0	100
NH	Pa	43	3	4	1	0	100
NH	Pa	7	3	4	3	0	100
NH	Pa	23	3	5	2	0	100
NH	Pa	98	3	5	3	0	100
NH	Pa	61	3	5	4	0	0
NH	Pa	110	12	1	3	0	100
NH	Pa	19	12	1	5	0	100
NH	Pa	3	12	3	1	0	90
NH	Pa	34	12	3	3	0	100
NH	Pa	40	12	3	6	0	90
NH	Pa	26	12	4	2	0	0
NH	Pa	41	12	4	3	0	100
NH	Pa	114	12	4	5	0	95
NH	Pa	64	12	5	2	0	0
NH	Pa	59	12	5	4	0	70

## Sheet: Partial Mortality
Treatment	Species	Number	Tank	Row	Colum	PM_heating_prop
A	Ls	5	1	1	3	0
A	Ls	4	1	1	5	0
A	Ls	46	1	2	1	0
A	Ls	69	1	2	2	0
A	Ls	76	1	2	6	0
A	Ls	3	1	3	3	0
A	Ls	93	1	3	4	0
A	Ls	*	1	4	1	0
A	Ls	*	1	4	6	0
A	Ls	2	1	5	2	0
A	Ls	47	4	1	2	0
A	Ls	32	4	1	4	0
A	Ls	*	4	2	2	0
A	Ls	61	4	2	5	0
A	Ls	65	4	2	6	0
A	Ls	*	4	4	2	0
A	Ls	*	4	4	4	0
A	Ls	*	4	4	6	0
A	Ls	98	4	5	1	0
A	Ls	*	4	5	4	0
A	Ls	68	11	1	6	0
A	Ls	110	11	2	1	0
A	Ls	101	11	2	5	0
A	Ls	63	11	3	3	0
A	Ls	10	11	3	4	0
A	Ls	97	11	4	1	0
A	Ls	52	11	4	2	0
A	Ls	119	11	5	1	0
A	Ls	44	11	5	2	0
A	Mc	62	1	1	4	0
A	Mc	64	1	2	5	0.15
A	Mc	67	1	3	1	0
A	Mc	96	1	3	6	0
A	Mc	38	1	4	2	0
A	Mc	29	1	4	5	0
A	Mc	106	1	5	6	0
A	Mc	46	4	1	1	0
A	Mc	30	4	1	5	0
A	Mc	70	4	2	3	0
A	Mc	77	4	3	1	0
A	Mc	50	4	4	3	0
A	Mc	16	4	5	2	0
A	Mc	79	4	5	6	0
A	Mc	*	11	1	2	0
A	Mc	95	11	1	3	0
A	Mc	102	11	2	3	0
A	Mc	112	11	2	4	0
A	Mc	53	11	2	6	0
A	Mc	92	11	3	6	0
A	Mc	93	11	4	4	0
A	Mc	105	11	4	5	0
A	Mc	100	11	5	3	0
A	Pa	109	1	1	1	0
A	Pa	24	1	1	2	0
A	Pa	52	1	2	3	0
A	Pa	65	1	2	4	0
A	Pa	4	1	3	5	0
A	Pa	73	1	4	3	0
A	Pa	38	1	4	4	0
A	Pa	75	1	5	1	0
A	Pa	53	1	5	4	0
A	Pa	1	1	5	5	0
A	Pa	25	4	1	3	0
A	Pa	50	4	2	1	0
A	Pa	118	4	3	2	0
A	Pa	104	4	3	3	0
A	Pa	55	4	3	5	0
A	Pa	101	4	3	6	0
A	Pa	33	4	4	1	0
A	Pa	97	4	4	5	0
A	Pa	105	4	5	3	0
A	Pa	78	11	1	1	0
A	Pa	84	11	1	4	0
A	Pa	95	11	3	1	0
A	Pa	80	11	3	2	0
A	Pa	14	11	3	5	0
A	Pa	86	11	4	3	0
A	Pa	100	11	4	6	0
A	Pa	81	11	5	4	0
A	Pa	85	11	5	5	0
A	Pa	15	11	5	6	0
H	Ls	117	2	1	1	0
H	Ls	94	2	1	2	0
H	Ls	*	2	1	5	0
H	Ls	*	2	1	6	0
H	Ls	59	2	2	3	0
H	Ls	22	2	2	5	0
H	Ls	51	2	3	1	0
H	Ls	115	2	4	2	0
H	Ls	*	2	4	5	0
H	Ls	*	2	5	6	0
H	Ls	39	6	1	2	0
H	Ls	*	6	2	2	0
H	Ls	*	6	2	6	0
H	Ls	15	6	3	1	0
H	Ls	34	6	3	3	0
H	Ls	75	6	4	5	0
H	Ls	31	6	4	6	0
H	Ls	106	6	5	1	0
H	Ls	*	6	5	4	0
H	Ls	71	6	5	5	0
H	Ls	*	7	1	6	0
H	Ls	113	7	2	3	0.05
H	Ls	66	7	2	5	0
H	Ls	64	7	3	1	0
H	Ls	26	7	3	4	0
H	Ls	95	7	3	6	0
H	Ls	*	7	4	1	0
H	Ls	24	7	4	5	0
H	Ls	*	7	5	2	0
H	Ls	57	7	5	5	0
H	Mc	15	2	1	4	0
H	Mc	94	2	2	1	0
H	Mc	78	2	3	2	0
H	Mc	108	2	3	4	0
H	Mc	109	2	3	6	0
H	Mc	58	2	4	6	0.3
H	Mc	18	2	5	2	0
H	Mc	65	2	5	4	0.5
H	Mc	20	2	5	5	0
H	Mc	5	6	1	1	0
H	Mc	22	6	1	4	0.05
H	Mc	81	6	1	6	0
H	Mc	117	6	2	3	0
H	Mc	54	6	2	5	0
H	Mc	110	6	3	6	0
H	Mc	42	6	4	2	0.4
H	Mc	84	6	4	4	0
H	Mc	76	6	5	2	0.9
H	Mc	6	6	5	3	0
H	Mc	73	7	1	3	0
H	Mc	66	7	1	4	0
H	Mc	21	7	1	5	0
H	Mc	31	7	2	2	0.05
H	Mc	27	7	2	4	0
H	Mc	11	7	3	2	0
H	Mc	57	7	4	6	0.05
H	Mc	55	7	5	1	0.25
H	Mc	82	7	5	3	0
H	Mc	1	7	5	6	0
H	Pa	29	2	1	3	0.5
H	Pa	31	2	2	2	0
H	Pa	76	2	2	4	0
H	Pa	42	2	2	6	0
H	Pa	27	2	3	3	0
H	Pa	35	2	3	5	0
H	Pa	21	2	4	1	0
H	Pa	79	2	4	3	0
H	Pa	89	2	4	4	0
H	Pa	48	2	5	3	0
H	Pa	108	6	1	3	0
H	Pa	83	6	1	5	0.05
H	Pa	63	6	2	1	0
H	Pa	93	6	2	4	0
H	Pa	20	6	3	2	0
H	Pa	5	6	3	4	0
H	Pa	28	6	3	5	0.5
H	Pa	36	6	4	1	0
H	Pa	2	6	4	3	0
H	Pa	8	6	5	6	0
H	Pa	46	7	1	1	0
H	Pa	106	7	1	2	1
H	Pa	56	7	2	6	0
H	Pa	94	7	3	3	1
H	Pa	47	7	3	5	1
H	Pa	11	7	4	2	0.05
H	Pa	68	7	4	3	0.8
H	Pa	107	7	4	4	1
H	Pa	66	7	5	4	0.6
N	Ls	*	5	1	1	0
N	Ls	*	5	1	4	0
N	Ls	48	5	2	1	0
N	Ls	*	5	2	2	0
N	Ls	*	5	2	4	0
N	Ls	85	5	3	2	0
N	Ls	99	5	3	6	0
N	Ls	*	5	4	1	0
N	Ls	19	5	5	3	0
N	Ls	45	9	1	2	0
N	Ls	103	9	1	3	0
N	Ls	27	9	2	1	0
N	Ls	*	9	2	5	0
N	Ls	*	9	3	2	0
N	Ls	28	9	3	6	0
N	Ls	36	9	4	4	0
N	Ls	33	9	5	1	0
N	Ls	102	9	5	4	0
N	Ls	112	9	5	6	0
N	Ls	67	10	1	1	0
N	Ls	*	10	1	6	0
N	Ls	62	10	2	1	0
N	Ls	40	10	2	2	0
N	Ls	116	10	2	4	0
N	Ls	*	10	3	4	0
N	Ls	77	10	3	6	0
N	Ls	115	10	4	3	0
N	Ls	92	10	4	4	0
N	Ls	105	10	5	1	0
N	Mc	33	5	1	3	0
N	Mc	68	5	1	5	0
N	Mc	25	5	2	6	0
N	Mc	120	5	3	1	0
N	Mc	118	5	3	4	0
N	Mc	91	5	4	3	0
N	Mc	63	5	4	6	0
N	Mc	52	5	5	2	0
N	Mc	28	5	5	5	0
N	Mc	49	5	5	6	0
N	Mc	48	9	2	2	0
N	Mc	75	9	2	3	0
N	Mc	50	9	3	1	0
N	Mc	88	9	4	1	0
N	Mc	119	9	4	3	0
N	Mc	71	9	4	6	0
N	Mc	61	9	5	2	0
N	Mc	103	9	5	3	0
N	Mc	37	9	5	5	0
N	Mc	9	10	1	2	0
N	Mc	3	10	2	5	0
N	Mc	41	10	2	6	0
N	Mc	45	10	3	2	0
N	Mc	44	10	3	3	0
N	Mc	36	10	3	5	0
N	Mc	89	10	4	1	0
N	Mc	8	10	4	6	0
N	Mc	114	10	5	3	0
N	Mc	113	10	5	5	0
N	Pa	92	5	1	2	0
N	Pa	69	5	1	6	0
N	Pa	116	5	2	3	0
N	Pa	44	5	2	5	0
N	Pa	82	5	3	3	0
N	Pa	17	5	3	5	0
N	Pa	32	5	4	4	0
N	Pa	72	5	4	5	0
N	Pa	83	5	5	1	0
N	Pa	119	5	5	4	0
N	Pa	39	9	1	1	0
N	Pa	71	9	1	5	0
N	Pa	30	9	1	6	0
N	Pa	87	9	2	4	0
N	Pa	58	9	2	6	0
N	Pa	12	9	3	3	0
N	Pa	6	9	3	4	0
N	Pa	77	9	3	5	0
N	Pa	91	9	4	2	0
N	Pa	120	9	4	5	0
N	Pa	96	10	1	3	0
N	Pa	9	10	1	4	0
N	Pa	99	10	1	5	0
N	Pa	13	10	2	3	0
N	Pa	74	10	3	1	0
N	Pa	117	10	4	2	0
N	Pa	51	10	5	2	0
N	Pa	10	10	5	4	0
N	Pa	16	10	5	6	0
NH	Ls	*	3	1	2	0
NH	Ls	*	3	1	3	0
NH	Ls	*	3	2	1	0
NH	Ls	37	3	2	3	1
NH	Ls	*	3	2	6	0
NH	Ls	*	3	3	1	0
NH	Ls	21	3	3	4	0.1
NH	Ls	121	3	5	1	0
NH	Ls	20	3	5	5	0
NH	Ls	89	3	5	6	0
NH	Ls	60	12	1	1	1
NH	Ls	107	12	1	6	0
NH	Ls	53	12	2	2	0
NH	Ls	109	12	2	4	0
NH	Ls	*	12	3	2	0
NH	Ls	9	12	3	5	0
NH	Ls	13	12	4	1	0
NH	Ls	56	12	4	6	1
NH	Ls	50	12	5	3	0
NH	Ls	120	12	5	5	0
NH	Mc	26	3	1	1	0
NH	Mc	47	3	1	4	0
NH	Mc	40	3	2	4	0
NH	Mc	90	3	2	5	0
NH	Mc	51	3	3	2	0
NH	Mc	7	3	3	3	0
NH	Mc	43	3	3	5	0
NH	Mc	4	3	4	2	0
NH	Mc	98	3	4	4	0.5
NH	Mc	69	3	4	6	0.3
NH	Mc	72	12	1	2	0.2
NH	Mc	124	12	1	4	0
NH	Mc	111	12	2	1	1
NH	Mc	39	12	2	5	0.5
NH	Mc	59	12	2	6	0.1
NH	Mc	116	12	3	4	0.1
NH	Mc	2	12	4	4	0
NH	Mc	23	12	5	1	0.5
NH	Mc	86	12	5	6	0.2
NH	Pa	112	3	1	5	0.5
NH	Pa	113	3	1	6	0
NH	Pa	70	3	2	2	0
NH	Pa	54	3	3	6	0
NH	Pa	43	3	4	1	0
NH	Pa	7	3	4	3	0
NH	Pa	23	3	5	2	0
NH	Pa	98	3	5	3	0
NH	Pa	61	3	5	4	1
NH	Pa	110	12	1	3	0
NH	Pa	19	12	1	5	0
NH	Pa	3	12	3	1	0.1
NH	Pa	34	12	3	3	0
NH	Pa	40	12	3	6	0.1
NH	Pa	26	12	4	2	1
NH	Pa	41	12	4	3	0
NH	Pa	114	12	4	5	0.05
NH	Pa	64	12	5	2	1
NH	Pa	59	12	5	4	0.3

## Sheet: Partial Bleaching Mortality Fig
	L. scutaria
	0	5	12	14	17	19	21	24	26	28	30
H (Bleaching)	0	3.33333	3.33333	46.6667	74.3333	66.6667	73.3333	76.6667	63.3333	88.3333	93.1667
HB_SE	0	3.33333	3.33333	9.26411	7.96087	8.75376	7.75091	7.85403	8.94855	5.71514	4.62678
NH (Bleaching)	0	0	0	25	15	20	35	60	60	65	49.5
NHB_SE	0	0	0	9.93399	8.19178	9.17663	10.9424	11.239	11.239	10.9424	11.3665
H (Mortality)	0	0	0	0	0	0	0.666667	0	0	1.66667	0.166667
HM_SE	0	0	0	0	0	0	0.463206	0	0	1.66667	0.166667
NH (Mortality)	0	0	0	0	0	0	2.5	5	5	5	15.5
NHM_SE	0	0	0	0	0	0	2.5	5	5	5	8.15879
	M. capitata
	0	5	12	14	17	19	21	24	26	28	30
H (Bleaching)	0	0.689655	10.3448	15.8621	27.069	72.4138	64.1379	77.5862	94.8276	93.7931	91.3793
HB_SE	0	0.689655	5.1929	6.08878	8.30276	8.44652	8.45544	7.11283	2.45003	3.23214	3.78694
NH (Bleaching)	0	0	5.26316	1.57895	14.2105	34.2105	47.3684	55.5263	77.5263	66.5789	76.8421
NHB_SE	0	0	7.69231	2.30769	9.5717	13.8675	12.7166	11.4139	8.6631	9.89342	8.20713
H (Mortality)	0	0	1.72414	0.517241	0.517241	0	1.37931	1.72414	3.44828	6.2069	8.62069
HM_SE	0	0	1.72414	0.517241	0.517241	0	0.602568	0.833263	1.85867	3.23214	3.78694
NH (Mortality)	0	0.526316	0	3.68421	3.68421	2.63158	6.05263	13.4211	11.8947	17.6316	17.8947
NHM_SE	0	0.526316	0	1.94373	2.77947	2.63158	2.90137	5.79943	6.459	6.97079	6.2398
	P. acuta
	0	5	12	14	17	19	21	24	26	28	30
H (Bleaching)	1.72414	0.172414	13.7931	30	49.4828	71.5517	64.4828	74.8276	79.6552	78.1034	74.1379
HB_SE	1.72414	0.172414	6.51663	7.20478	8.40898	8.20423	7.63364	7.66639	7.20021	7.07287	7.49823
NH (Bleaching)	0	0	0	3.68421	38.6842	56.5789	58.6842	78.1579	88.1579	83.1579	73.4211
NHB_SE	0	0	0	3.68421	10.4283	11.4456	10.7731	7.38667	7.2468	7.34698	9.39744
H (Mortality)	0	3.7931	5.17241	8.27586	14.8276	16.3793	18.2759	21.7241	20.3448	21.8966	22.4138
HM_SE	0	3.29815	3.79981	4.496	5.98892	6.82693	6.60402	7.22729	7.20021	7.07287	7.0607
NH (Mortality)	0	0.526316	5.26316	11.0526	10.5263	11.8421	11.3158	12.3684	11.8421	16.8421	21.3158
NHM_SE	0	0.526316	5.26316	7.21008	7.23352	7.2468	7.18228	7.21808	7.2468	7.34698	8.54847

[truncated: 3 more sheets: Days to Mortality, Total Mortality, Visual Assessment Conditions]
